# Supplementary material
Source: publisher figshare collection journal article supplement (https://acs.figshare.com/ndownloader/files/4043584)
Supplement: Supplementary file 1 [file 4043584]

## **Supplementary Information**

### **The Scope and Limitation of the Nicking Enzyme Amplification Reaction for the Synthesis of Base-Modified Oligonucleotides and Primers for PCR**

Petra Ménová, Veronika Raindlová and Michal Hocek

## Contents

|                                                                                                                                                  |     |
|--------------------------------------------------------------------------------------------------------------------------------------------------|-----|
| Single-stranded DNA Ladder .....                                                                                                                 | S2  |
| Supplementary Tables .....                                                                                                                       | S3  |
| Supplementary Figures.....                                                                                                                       | S4  |
| Synthesis of Modified dNTPs .....                                                                                                                | S7  |
| General remarks .....                                                                                                                            | S7  |
| 2'-Deoxy-7-(ferrocene-1-yl-ethynyl)-7-deazaguanosine 5'- <i>O</i> -triphosphate<br>tris-triethylammonium salt ( <b>dG<sup>Fc</sup>TP</b> ) ..... | S7  |
| 2'-Deoxy-7-(5-formylthiophene-2-yl)-7-deazaguanosine 5'- <i>O</i> -triphosphate<br>trisodium salt ( <b>dG<sup>FT</sup>TP</b> ).....              | S8  |
| 2'-Deoxy-5-(5-formylthiophene-2-yl)uridine 5'- <i>O</i> -triphosphate<br>trisodium salt ( <b>dU<sup>FT</sup>TP</b> ).....                        | S9  |
| NMR Spectra.....                                                                                                                                 | S10 |
| NMR spectra of compound <b>dG<sup>Fc</sup>TP</b> .....                                                                                           | S10 |
| NMR spectra of compound <b>dG<sup>FT</sup>TP</b> .....                                                                                           | S12 |
| NMR spectra of compound <b>dU<sup>FT</sup>TP</b> .....                                                                                           | S14 |
| UV Spectra .....                                                                                                                                 | S16 |
| MALDI-TOF Spectra .....                                                                                                                          | S20 |
| References .....                                                                                                                                 | S43 |

## Single-stranded DNA Ladder

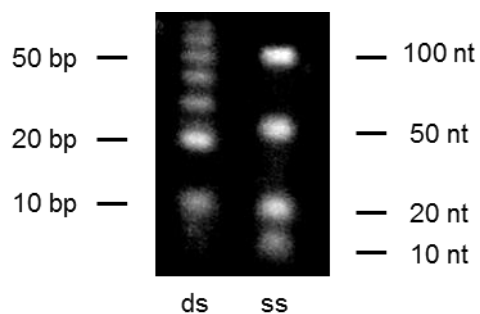

**Figure S1.** Comparison of different mobilities of ss and ds ONs. Run on 4% agarose gel, 120 V, 70 min.

**Table S1.** Sequences of commercial oligonucleotides used for ss DNA ladder.

| Oligo       | Length | Sequence                                                                                                    |
|-------------|--------|-------------------------------------------------------------------------------------------------------------|
| <b>L10</b>  | 10 nt  | 5'-CAGTGACTAG-3'                                                                                            |
| <b>L20</b>  | 20 nt  | 5'-CAGTGACTAGCTTACGGACT-3'                                                                                  |
| <b>L50</b>  | 50 nt  | 5'-CAGTGCATGACTATCGGACCGTATGACTAGCTCAGGTATCCAGTG<br>ACTAG-3'                                                |
| <b>L100</b> | 100 nt | 5'-GACATCATGAGAGACATCGCCTCTGGGCTAATAGGACTACTTCTAATCT<br>GTAAGAGCAGATCCCTGGACAGGCAAGGAATACAGGTATTTTGTCTTG-3' |

## Supplementary Tables

**Table S2.** Comparison of our original<sup>[a]</sup> and optimized conditions for NEAR.

|                      | Original conditions | Optimized conditions |                  |
|----------------------|---------------------|----------------------|------------------|
|                      | Modified dNTPs      | Modified dNTPs       | Natural dNTPs    |
| Template             | 0.125 $\mu$ M       | 0.125 $\mu$ M        | 0.125 $\mu$ M    |
| Primer               | 0.125 $\mu$ M       | 0.125 $\mu$ M        | 0.125 $\mu$ M    |
| dNTPs <sup>[b]</sup> | 125/188 $\mu$ M     | 125/156 $\mu$ M      | 125 $\mu$ M      |
| Nt.BstNBI            | 0.6 U/ $\mu$ L      | 0.6 U/ $\mu$ L       | 0.9 U/ $\mu$ L   |
| Vent(exo-)           | 0.15 U/ $\mu$ L     | 0.10 U/ $\mu$ L      | 0.075 U/ $\mu$ L |
| ThermoPol Buffer     | 1x                  | 1x                   | 1x               |
| NEBuffer 3           | 0.5x                | 0.5x                 | 0.5x             |

<sup>[a]</sup> see lit [S1].

<sup>[b]</sup> natural/modified.

## Supplementary Figures

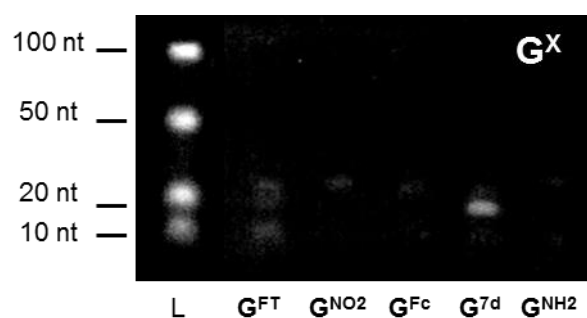

**Figure S2.** Incorporation of modified 7-deazaguanosine triphosphates in NEAR. In all the experiments, natural dATP, dCTP and dTTP were used together with the modified **dG<sup>X</sup>TP** as indicated in the title of the line. **L** = DNA ladder. Template **Nick2**. The standard reaction conditions were used.

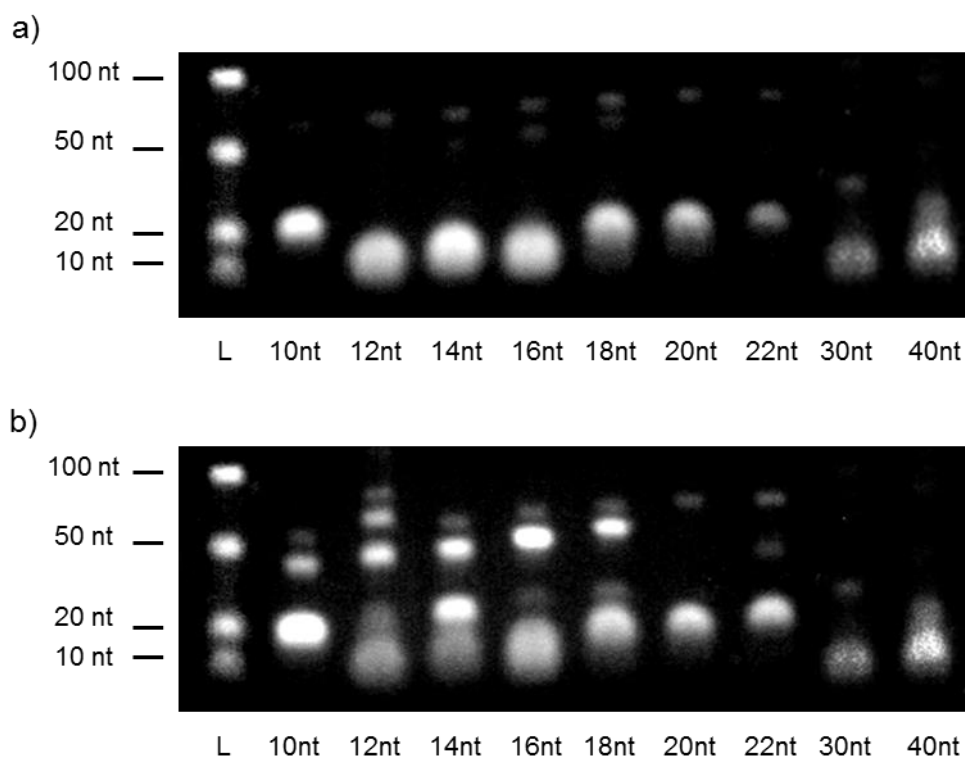

**Figure S3.** Comparison of the outcome of NEAR with natural dNTPs under the conditions optimized for natural dNTPs (a), and under the conditions used for modified dNTPs (b). The results suggest that for shorter ONs (10-18 nt), conditions (a) are more favourable, while for longer ONs (above 20 nt) the reaction should be done according to the same protocol as with modified dNTPs.

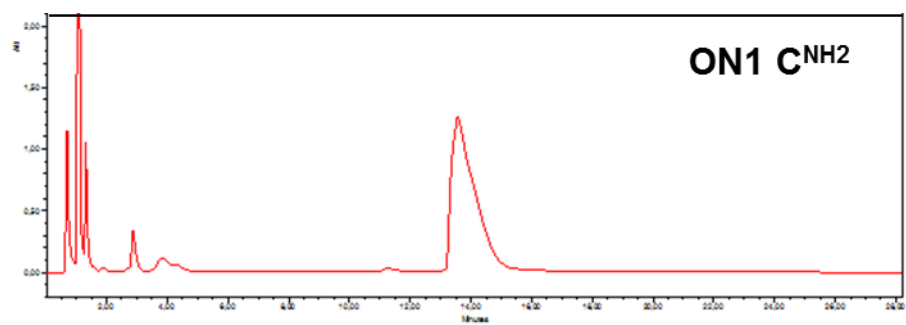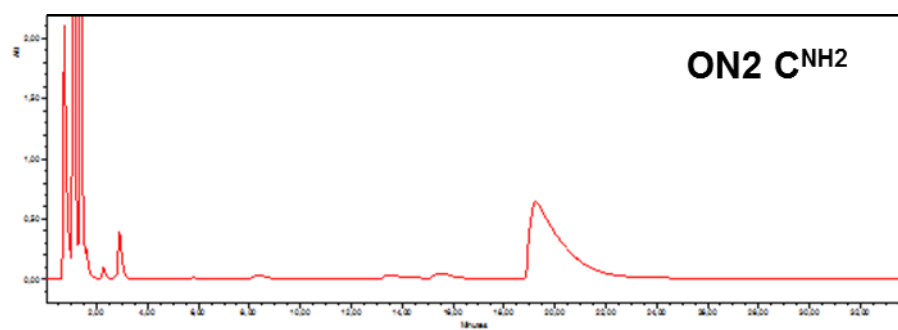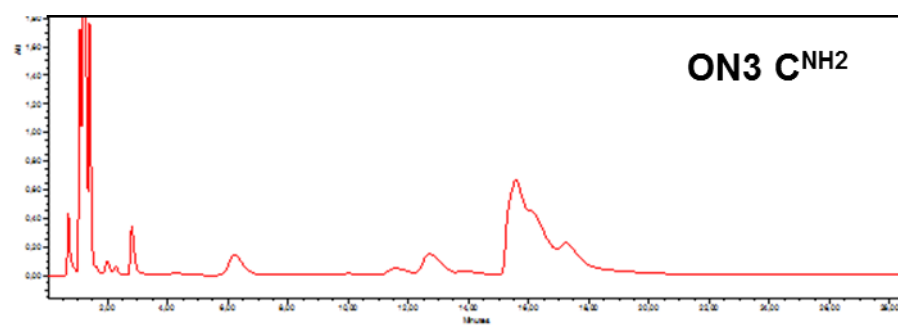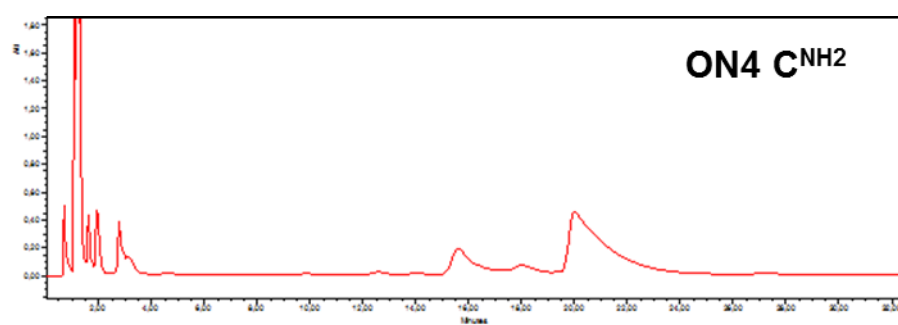

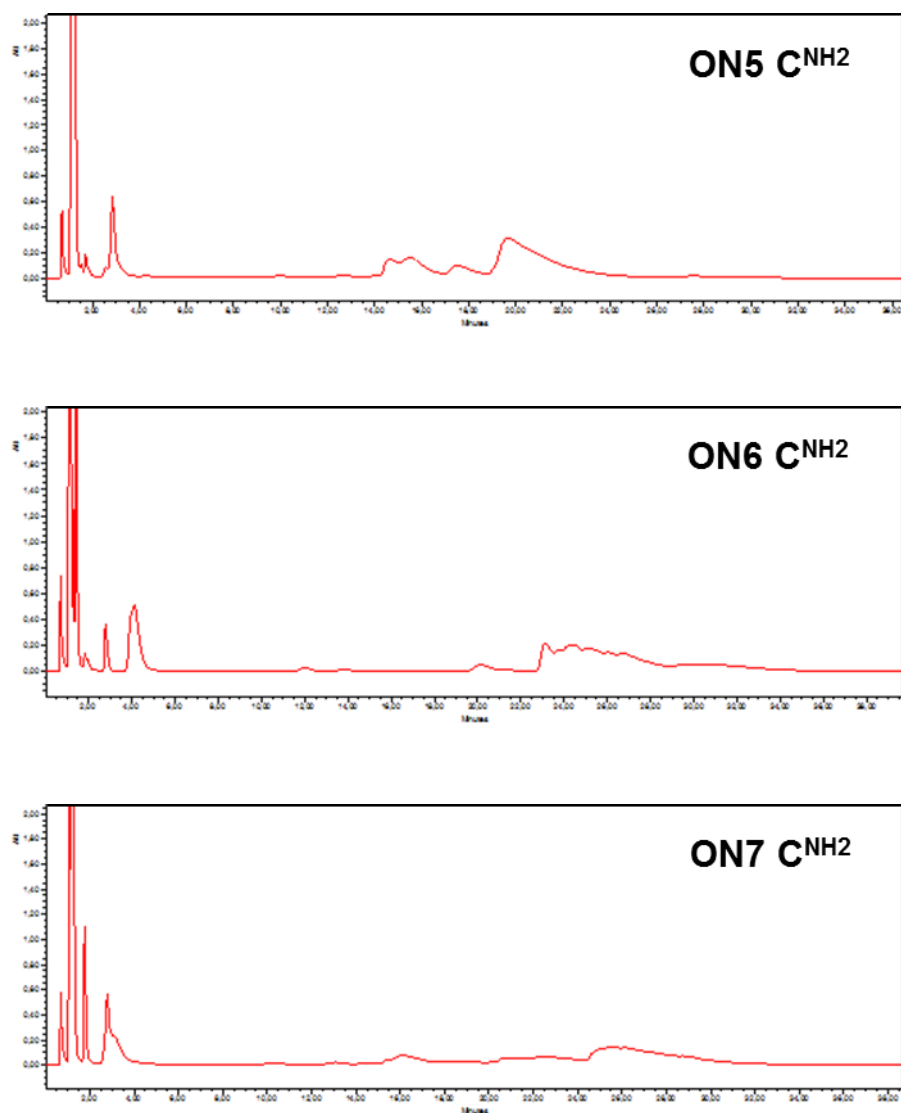

**Figure S4.** HPLC chromatograms of crude NEAR mixtures (semi-preparative reactions). Column XBridge OST C18 2.5  $\mu$ M (4.6  $\times$  50 mm). Mobile phase A: 0.1 M TEAA, B: acetonitrile/0.1M TEAA, 20/80 (v/v). Flow rate: 1 mL/min. Gradient 40 to 80 % B in 53 min.

## Synthesis of Modified dNTPs

### General remarks

Ethynylferrocene was purchased from Molekula Deutschland Ltd and 5-formylthiophene-2-boronic acid from Frontier Scientific. NMR spectra were measured on Bruker Avance 500 at 500 MHz for  $^1\text{H}$ , 200 MHz for  $^{31}\text{P}$  and 125.7 MHz for  $^{13}\text{C}$ , in 50mM phosphate buffer (in  $\text{D}_2\text{O}$ ) at pD 7.1 (reference to dioxane as internal standard,  $\delta_{\text{H}} = 3.75$  ppm,  $\delta_{\text{C}} = 67.19$  ppm).  $^{31}\text{P}$  NMR spectra were referenced to the phosphate buffer signal ( $\delta = 2.35$  ppm). Chemical shifts are given in ppm ( $\delta$  scale), coupling constants ( $J$ ) in Hz. Mass spectra were measured by ESI. High resolution mass spectra were measured on a LTQ Orbitrap XL (Hermo Fischer Scientific) spectrometer using ESI ionization technique.

### *2'-Deoxy-7-(ferrocene-1-yl-ethynyl)-7-deazaguanosine 5'-O-triphosphate tris(triethylammonium) salt (dG<sup>Fc</sup>TP)*

A water/acetonitrile mixture 2:1 (1 mL) and  $\text{Et}_3\text{N}$  (58  $\mu\text{L}$ , 0.416 mmol, 8 equiv.) were added to an argon-purged flask containing 2'-deoxy-7-iodo-7-deazaguanosine triphosphate (**dG<sup>I</sup>TP**) (36 mg, 0.052 mmol), ethynylferrocene, (16 mg, 0.076 mmol, 1.5 equiv.), and  $\text{CuI}$  (1 mg, 0.005 mmol, 10 mol%). In a separate flask,  $\text{Pd}(\text{OAc})_2$  (0.6 mg, 0.0025 mmol, 5 mol%) and TPPTS (7.5 mg, 0.013 mmol, 5 equiv. to Pd) were combined under argon and a mixture of water/acetonitrile 2:1 (0.5 mL) was added. After dissolution of the solids, the catalyst solution was added to the reaction mixture through a septum and the mixture was stirred at 70 °C for 1 h. The reaction mixture was concentrated on a rotatory evaporator and the product was isolated by semi-preparative HPLC on a C18 column with a linear gradient of 0.1 M TEAB in  $\text{H}_2\text{O}$  to 0.1 M TEAB in  $\text{H}_2\text{O}/\text{MeOH}$  1:1 as eluent. Several co-distillations with water, followed by freeze-drying from water gave **dG<sup>Fc</sup>TP** as a yellow powder (10 mg, 25 %).

$^1\text{H}$  NMR (500 MHz,  $\text{D}_2\text{O}$ , pH = 7.1, phosphate buffer,  $\text{ref}_{\text{dioxane}} = 3.75$  ppm): 1.27 (bs, 32H,  $\text{CH}_3\text{CH}_2\text{N}$ ); 2.41 (ddd, 1H,  $J_{\text{gem}} = 14.1$ ,  $J_{2'b,1'} = 6.2$ ,  $J_{2'b,3'} = 3.1$ , H-2'b); 2.66 (ddd, 1H,  $J_{\text{gem}} = 14.1$ ,  $J_{2'a,1'} = 8.1$ ,  $J_{2'a,3'} = 6.3$ , H-2'a); 3.19 (bs, 24H,  $\text{CH}_3\text{CH}_2\text{N}$ ); 4.15 (bm, 2H, H-5'); 4.21 (bm, 1H, H-4'); 4.37 (bs, 5H, cp); 4.59 (bs, 2H, cp); 4.72 (bm, 1H, H-3'); 4.83 (bs, 2H, cp); 6.41 (dd, 1H,  $J_{1'2'} = 8.1$ , 6.2, H-1'); 7.32 (s, 1H, H-6).  $^{13}\text{C}$  NMR (151 MHz,  $\text{D}_2\text{O}$ , pH = 7.1, phosphate buffer,  $\text{ref}_{\text{dioxane}} = 69.3$  ppm): 10.95 ( $\text{CH}_3\text{CH}_2\text{N}$ ); 40.89 ( $\text{CH}_2\text{-2'}$ ); 49.34 ( $\text{CH}_3\text{CH}_2\text{N}$ ); 61.70 (C-cp); 68.31 (d,  $J_{\text{C,P}} = 6$ ,  $\text{CH}_2\text{-5'}$ ); 71.99, 72.77 and 73.80 (CH-cp); 74.12 ( $\text{CH-3'}$ ); 81.11 ( $\text{C}\equiv\text{C-fer}$ ); 85.76 ( $\text{CH-1'}$ ); 87.85 (d,  $J_{\text{C,P}} = 8$ ,  $\text{CH-4'}$ ); 92.94 ( $\text{C}\equiv\text{C-fer}$ ); 102.27 and 102.88 (C-4a,5); 125.54 (CH-6); 153.56 (C-7a); 156.08 and 163.63 (C-2,4).  $^{31}\text{P}$  ( $^1\text{H}$  dec.)



NMR (202.3 MHz, D<sub>2</sub>O, pH = 7.1, phosphate buffer, ref<sub>H<sub>3</sub>PO<sub>4</sub></sub> = 0 ppm): -21.22 (t,  $J$  = 19.4, P <sub>$\beta$</sub> ); -10.23 (d,  $J$  = 19.4, P <sub>$\alpha$</sub> ); -6.20 (d,  $J$  = 19.4, P <sub>$\gamma$</sub> ). MS (ESI<sup>-</sup>):  $m/z$ : 800.9 [M + Na]<sup>-</sup>, 778.9 [M]<sup>-</sup>, 655.0 [M + 2H - Na - HPO<sub>3</sub>Na]<sup>-</sup>, 633.0 [M + 3H - 2Na - HPO<sub>3</sub>Na]<sup>-</sup>, 553.0 [M + 3H - Na - 2HPO<sub>3</sub>Na]<sup>-</sup>. HRMS (ESI<sup>-</sup>):  $m/z$  [M + Na]<sup>+</sup> calculated for C<sub>23</sub>H<sub>21</sub>O<sub>13</sub>N<sub>4</sub>FeNa<sub>3</sub>P<sub>3</sub>: 778.93660; found 778.93694.

*2'-Deoxy-7-(5-formylthiophene-2-yl)-7-deazaguanosine 5'-O-triphosphate trisodium salt (dG<sup>FT</sup>TP)*

A water/acetonitrile mixture 2:1 (1 mL) was added through a septum to an argon-purged vial containing 2'-deoxy-7-iodo-7-deazaguanosine triphosphate (**dG<sup>I</sup>TP**) (20 mg, 0.030 mmol), 5-formylthiophene-2-boronic acid (28 mg, 0.180 mmol, 6 equiv.) and Cs<sub>2</sub>CO<sub>3</sub> (49 mg, 0.150 mmol, 5 equiv.). In a separate flask, Pd(OAc)<sub>2</sub> (1.0 mg, 15 mol%) and TPPTS (13 mg, 0.023 mmol, 5 equiv. to Pd) were combined under argon atmosphere and a mixture of water/acetonitrile 2:1 (0.5 mL) was added. After dissolution, the catalyst solution was added to the reaction mixture through a septum and the resulting mixture was stirred at 100 °C for 1 h. The reaction mixture was then extracted with chloroform (2 × 4 mL). The aqueous layer containing the product was concentrated on a rotatory evaporator and the product was isolated by semi-preparative HPLC on a C18 column with a linear gradient of 0.1 M TEAB in H<sub>2</sub>O to 0.1 M TEAB in H<sub>2</sub>O/MeOH 1:1 as eluent. Several co-distillations with water and the conversion to sodium salt form (Dowex 50WX8 in Na<sup>+</sup> cycle), followed by freeze-drying from water gave **dG<sup>FT</sup>TP** as a yellowish powder (9 mg, 49 %).

<sup>1</sup>H NMR (499.8 MHz, D<sub>2</sub>O, pD = 7.1, phosphate buffer, ref<sub>dioxane</sub> = 3.75 ppm): 2.42 (ddd, 1H,  $J_{\text{gem}} = 13.9$ ,  $J_{2'b,1'} = 6.1$ ,  $J_{2'b,3'} = 3.1$ , H-2'b); 2.67 (ddd, 1H,  $J_{\text{gem}} = 13.9$ ,  $J_{2'a,1'} = 8.1$ ,  $J_{2'a,3'} = 6.4$ , H-2'a); 4.16 (bm, 2H, H-5'); 4.22 (bm, 1H, H-4'); 4.73 (bddd, 1H,  $J_{3',2'} = 6.4$ , 3.1,  $J_{3',4'} = 2.7$ , H-3'); 6.33 (dd, 1H,  $J_{1',2'} = 8.1$ , 6.1, H-1'); 7.50 (s, 1H, H-6); 7.66 (d, 1H,  $J_{3,4} = 4.1$ , H-3-thienyl); 7.82 (d, 1H,  $J_{4,3} = 4.1$ , H-4-thienyl); 9.65 (s, 1H, CHO). <sup>13</sup>C NMR (125.7 MHz, D<sub>2</sub>O, pD = 7.1, phosphate buffer, ref<sub>dioxane</sub> = 69.3 ppm): 40.96 (CH<sub>2</sub>-2'); 68.39 (d,  $J_{C,P} = 5.1$ , CH<sub>2</sub>-5'); 73.94 (CH-3'); 85.86 (CH-1'); 87.82 (d,  $J_{C,P} = 8.6$ , CH-4'); 100.27 (C-4a); 115.97 (C-5); 121.24 (CH-6); 129.58 (CH-3-thienyl); 142.03 (C-5-thienyl); 143.40 (CH-4-thienyl); 151.17 (C-2-thienyl); 154.88 (C-7a); 155.72 (C-2); 163.13 (C-4); 188.98 (CHO). <sup>31</sup>P (<sup>1</sup>H dec.) NMR (202.3 MHz, D<sub>2</sub>O, pD = 7.1, phosphate buffer, ref<sub>phosphate buffer</sub> = 2.35 ppm): -21.02 (bdd,  $J$  = 19.2, 17.4, P <sub>$\beta$</sub> ); -10.02 (d,  $J$  = 19.2, P <sub>$\alpha$</sub> ); -6.89 (bd,  $J$  = 19.2, P <sub>$\gamma$</sub> ). IR: 3437, 3178, 2954, 1663, 1543, 1506, 1453, 1242, 1131, 1093, 984, 908 cm<sup>-1</sup>. MS (ESI<sup>-</sup>):  $m/z$  (%): 615.0 (10)

$[M]^-$ , 557.0 (45)  $[M + 2H - Na - HPO_3Na]^-$ , 535.1 (100)  $[M + 3H - 2Na - HPO_3Na]^-$ . HRMS (ESI<sup>-</sup>):  $m/z$   $[M - H]^-$  calculated for  $C_{16}H_{18}O_{14}N_4P_3S$ : 614.9759; found 614.9759. UV/Vis ( $H_2O$ , 100  $\mu M$ )  $\lambda_{max}$  ( $\epsilon$ ) = 378 (17390),  $\lambda$  ( $\epsilon$ ) = 269 (17180),  $\lambda$  ( $\epsilon$ ) = 232 (20820).

*2'-Deoxy-5-(5-formylthiophene-2-yl)uridine 5'-O-triphosphate trisodium salt (dU<sup>FT</sup>TP)*

A water/acetonitrile mixture 2:1 (1 mL) was added through a septum to an argon-purged vial containing 2'-deoxy-5-iodouridine triphosphate (dU<sup>I</sup>TP) (20 mg, 0.030 mmol), 5-formylthiophene-2-boronic acid (28 mg, 0.180 mmol, 6 equiv.) and  $CS_2CO_3$  (49 mg, 0.150 mmol, 5 equiv.). In a separate flask,  $Pd(OAc)_2$  (0.7 mg, 10 mol%) and TPPTS (9 mg, 0.015 mmol, 5 equiv. to Pd) were combined under argon atmosphere and a mixture of water/acetonitrile 2:1 (0.5 mL) was added. After dissolution, the catalyst solution was added to the reaction mixture through a septum and the resulting mixture was stirred at 90 °C for 1 hour. The resulting mixture was then extracted with chloroform ( $2 \times 4$  mL). The aqueous layer containing the product was concentrated on a rotatory evaporator and the product was isolated by semi-preparative HPLC on a C18 column with the use of linear gradient of 0.1 M TEAB in  $H_2O$  to 0.1 M TEAB in  $H_2O/MeOH$  1:1 as eluent. Several co-distillations with water and the conversion to sodium salt form (Dowex 50WX8 in  $Na^+$  cycle), followed by freeze-drying from water gave dU<sup>FT</sup>TP as a light-yellow powder (8 mg, 40 %).

<sup>1</sup>H NMR (499.8 MHz,  $D_2O$ , pD = 7.1, phosphate buffer,  $ref_{dioxane}$  = 3.75 ppm): 2.47 (m, 2H, H-2'b); 4.25-4.33 (bm, 3H, H-4',5'); 4.71 (m, 1H, H-3'); 6.36 (t, 1H,  $J_{1'2'} = 6.8$ , H-1'); 7.72 (d, 1H,  $J_{3,4} = 4.2$ , H-3-thienyl); 8.02 (d, 1H,  $J_{4,3} = 4.2$ , H-4-thienyl); 8.47 (s, 1H, H-6); 9.79 (s, 1H, CHO). <sup>13</sup>C NMR (125.7 MHz,  $D_2O$ , pD = 7.1, phosphate buffer,  $ref_{dioxane}$  = 69.3 ppm): 42.06 ( $CH_2-2'$ ); 68.13 (d,  $J_{C,P} = 5.6$ ,  $CH_2-5'$ ); 73.35 ( $CH-3'$ ); 88.83 (d,  $J_{C,P} = 8.8$ ,  $CH-4'$ ); 89.93 ( $CH-1'$ ); 111.55 (C-5); 128.15 ( $CH-3$ -thienyl); 141.70 ( $CH-6$ ); 142.47 ( $CH-4$ -thienyl); 144.04 (C-5-thienyl); 147.23 (C-2-thienyl); 153.27 (C-2); 165.88 (C-4); 189.92 (CHO). <sup>31</sup>P (<sup>1</sup>H dec.) NMR (202.3 MHz,  $D_2O$ , pD = 7.1, phosphate buffer,  $ref_{phosphate\ buffer}$  = 2.35 ppm): -21.19 (bdd,  $J = 22.8, 18.2$ ,  $P_\beta$ ); -10.37 (d,  $J = 18.2$ ,  $P_\alpha$ ); -6.98 (bd,  $J = 22.8$ ,  $P_\gamma$ ). IR: 3424, 2923, 2854, 1704, 1654, 1523, 1457, 1241, 1127, 1092, 989, 911  $cm^{-1}$ . MS (ESI<sup>+</sup>):  $m/z$  (%): 666.9 (60)  $[M + Na]^+$ , 689.0 (100)  $[M + 2Na]^+$ . HRMS (ESI<sup>+</sup>):  $m/z$   $[M + Na]^+$  calculated for  $C_{14}H_{14}O_{15}N_2Na_4P_3S$ : 666.8913; found 666.8918. UV/Vis ( $H_2O$ , 100 $\mu M$ )  $\lambda_{max}$  ( $\epsilon$ ) = 352 (16090),  $\lambda$  ( $\epsilon$ ) = 291 (7190).

# NMR Spectra

NMR spectra of compound **dG<sup>Fc</sup>TP**

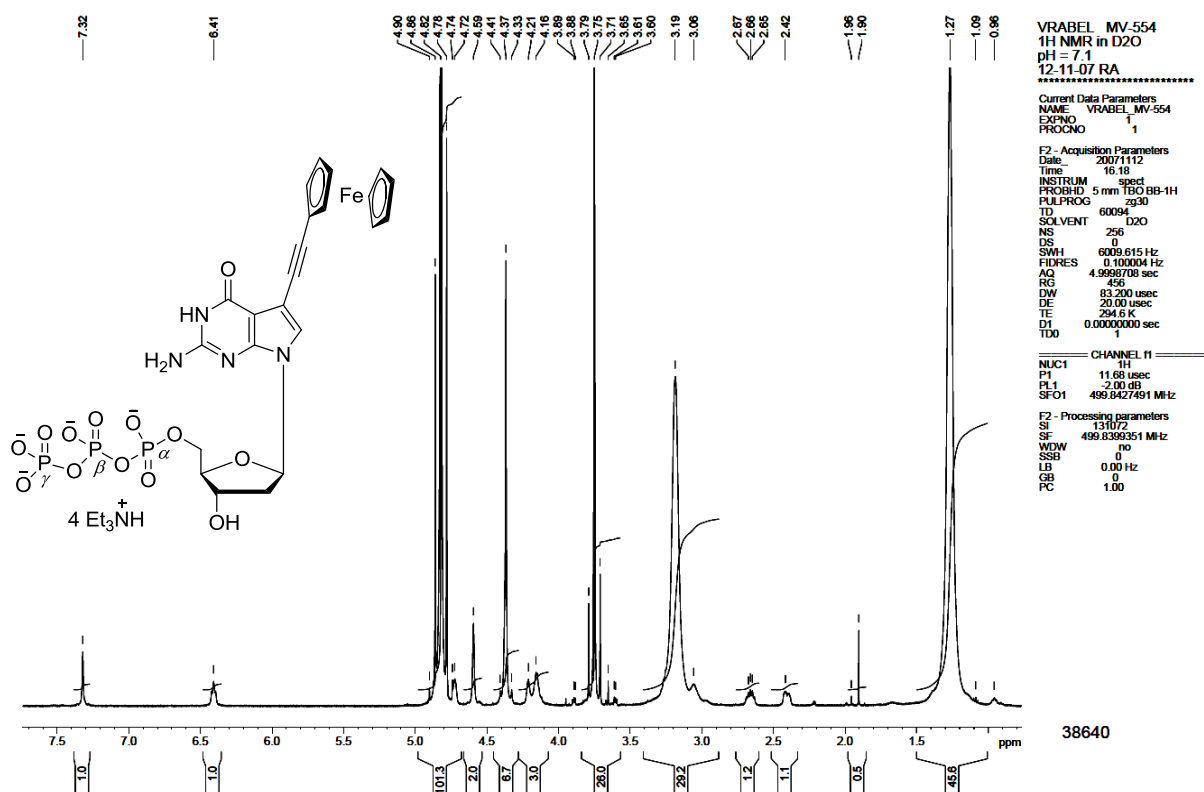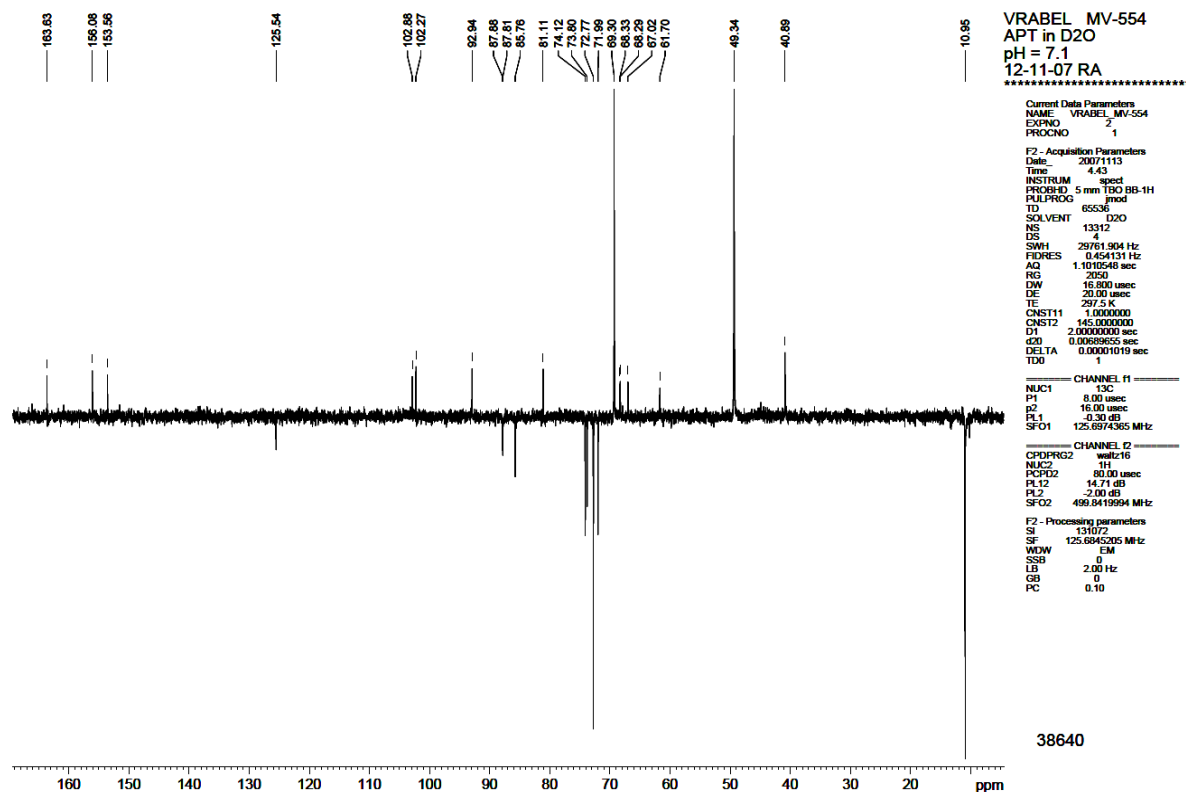

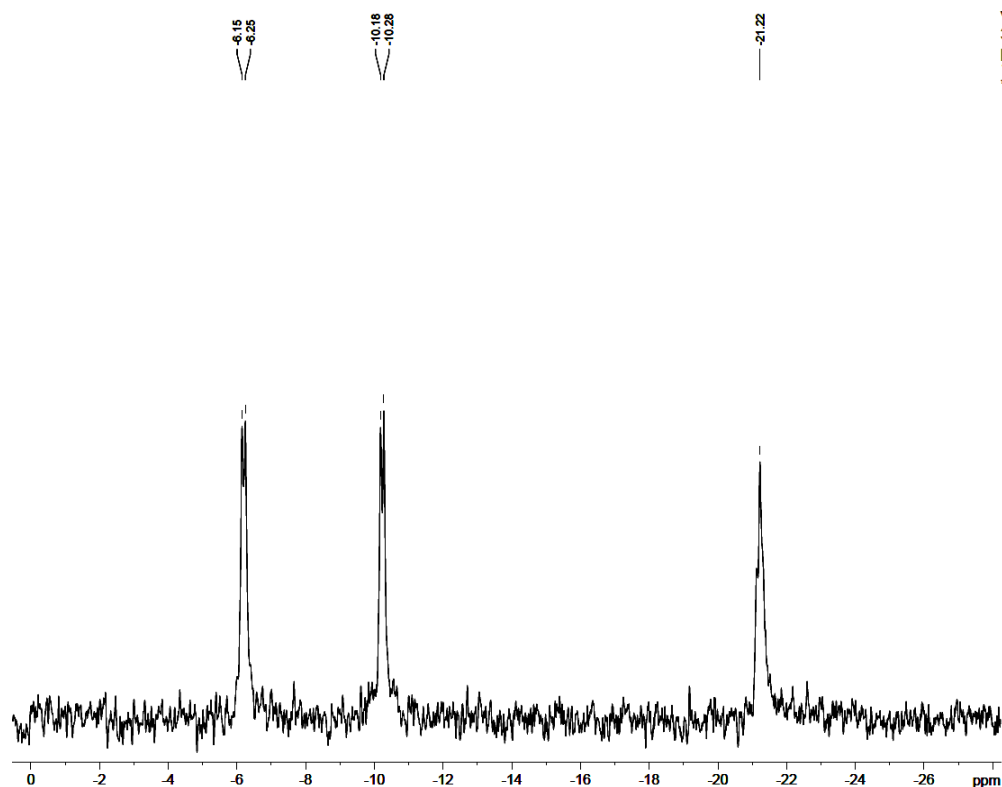

VRABEL MV-554  
31P NMR in D2O  
pH = 7.1  
12-11-07 RA  
\*\*\*\*\*

Current Data Parameters  
NAME VRABEL\_MV-554  
EXPNO 10  
PROCNO 1

F2 - Acquisition Parameters  
Date\_ 20071112  
Time 16:35  
INSTRUM spect  
PROBHD 5 mm TBO BB-1H  
PULPROG zgpg30  
TD 163054  
SOLVENT D2O  
NS 4  
DS 256  
SWH 81521.742 Hz  
FIDRES 0.500029 Hz  
AQ 0.9999919 sec  
RG 23100  
DM 5.133 usec  
DE 6.00 usec  
TE 295.0 K  
D1 2.00000000 sec  
d11 0.03000000 sec  
DELTA 1.89999999 sec  
TD0 1

CHANNEL F1  
NUC1 31P  
P1 7.80 usec  
PL1 -0.50 dB  
SFO1 202.3080239 MHz

CHANNEL F2  
CPDPRG2 waltz16  
NUC2 1H  
PCPD2 80.00 usec  
PL12 15.56 dB  
PL13 15.56 dB  
PL2 -2.50 dB  
SFO2 499.8419994 MHz

F2 - Processing parameters  
SI 131072  
SF 202.308040 MHz  
WDW EM  
SSB 0  
LB 5.00 Hz  
GB 0  
PC 1.40

# NMR spectra of compound **dG<sup>FT</sup>TP**

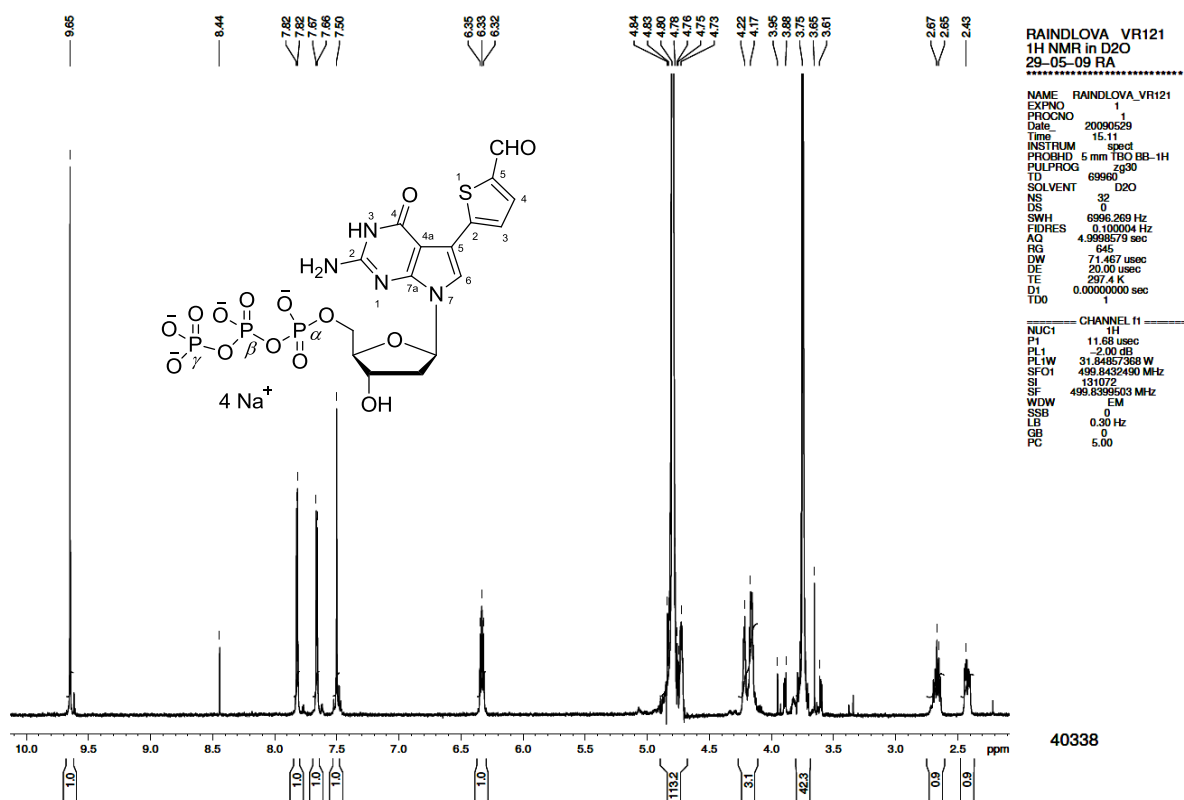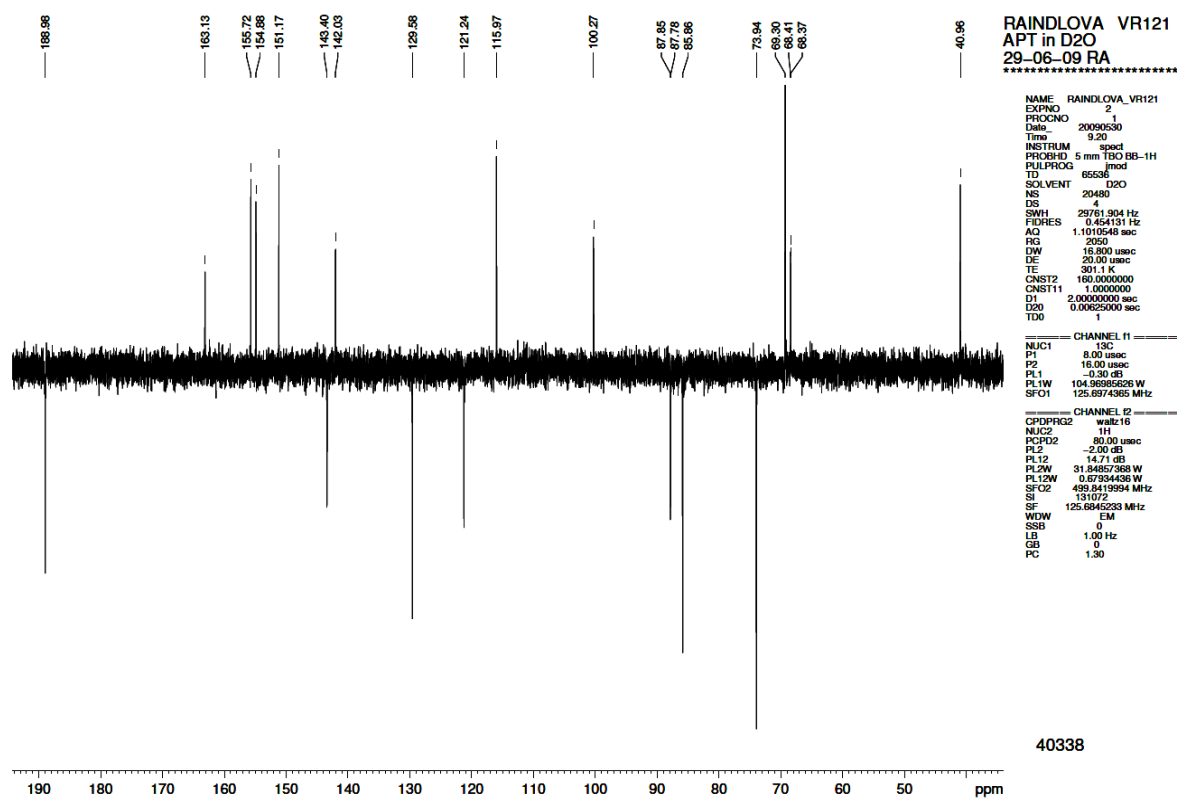

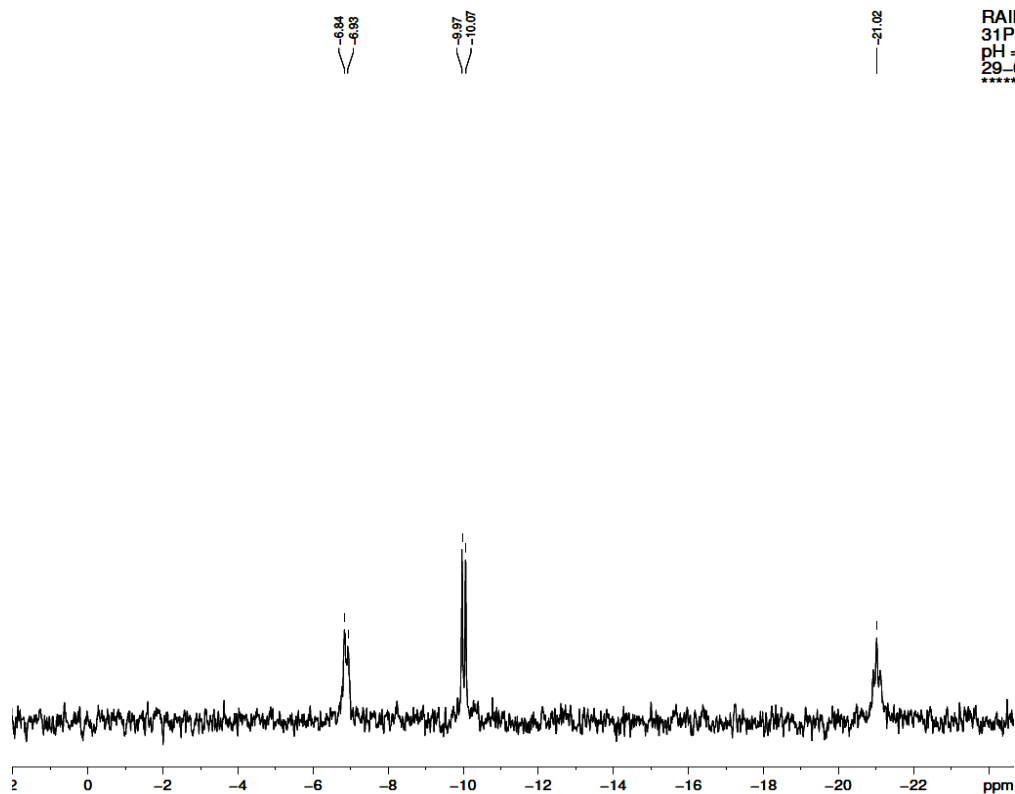

RAINDOLOVA VR121  
31P{1H} NMR in D2O  
pH = 7.1, phosphate buffer  
29-05-09 RA

```

=====
NAME  RAINDOLOVA_VR121
EXPNO  10
PROCNO  1
Date_  20090529
Time  14.59
INSTRUM  spect
PROBHD  5 mm TBO BB-1H
PULPROG  zgpg30
TD  65536
SOLVENT  D2O
NS  64
DS  4
SWH  81521.742 Hz
FIDRES  1.243923 Hz
AQ  0.4020041 sec
RG  23100
DW  6.133 usec
DE  6.00 usec
TE  298.3 K
D1  2.00000000 sec
D11  0.03000000 sec
TDO  1
=====

```

```

===== CHANNEL f1 =====
NUC1  31P
P1  7.80 usec
PL1  -0.50 dB
PL1W  93.00663757 W
SFO1  202.3288239 MHz
=====

```

```

===== CHANNEL f2 =====
CPDPRG2  waltz16
NUC2  1H
PCPD2  80.00 usec
PL2  -2.50 dB
PL12  15.56 dB
PL13  15.60 dB
PL2W  35.73468731 W
PL12W  0.55888588 W
PL13W  0.553464711 W
SFO2  499.8419994 MHz
SI  131072
SF  202.3367391 MHz
WDW  EM
SSB  0
LB  3.00 Hz
GB  0
RC  0.80
=====

```

40338

# NMR spectra of compound **dU<sup>FT</sup>TP**

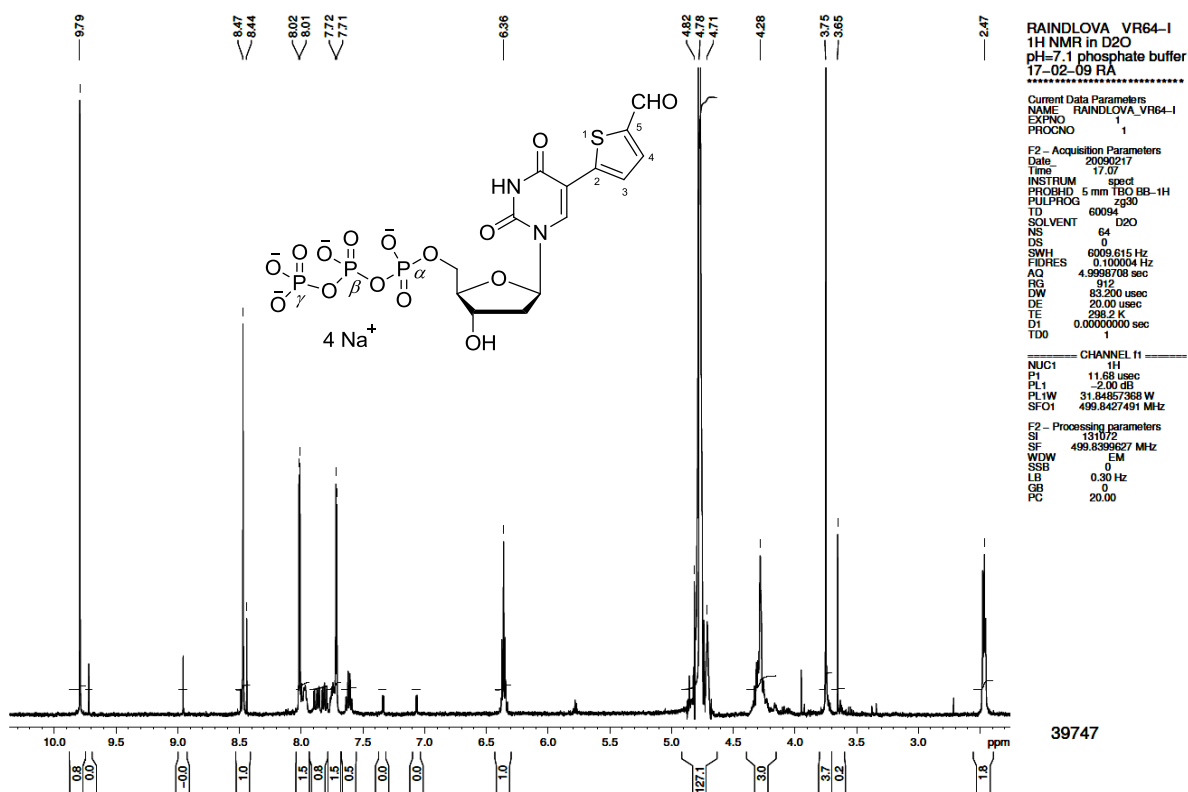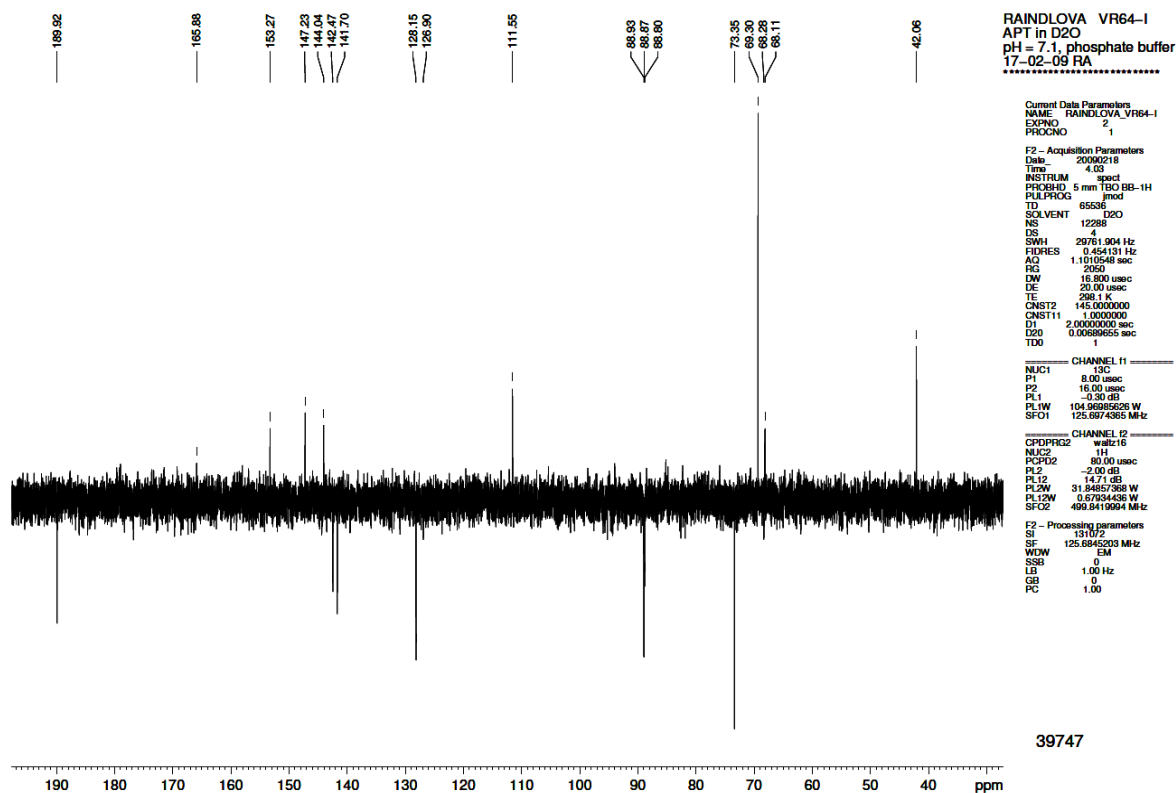

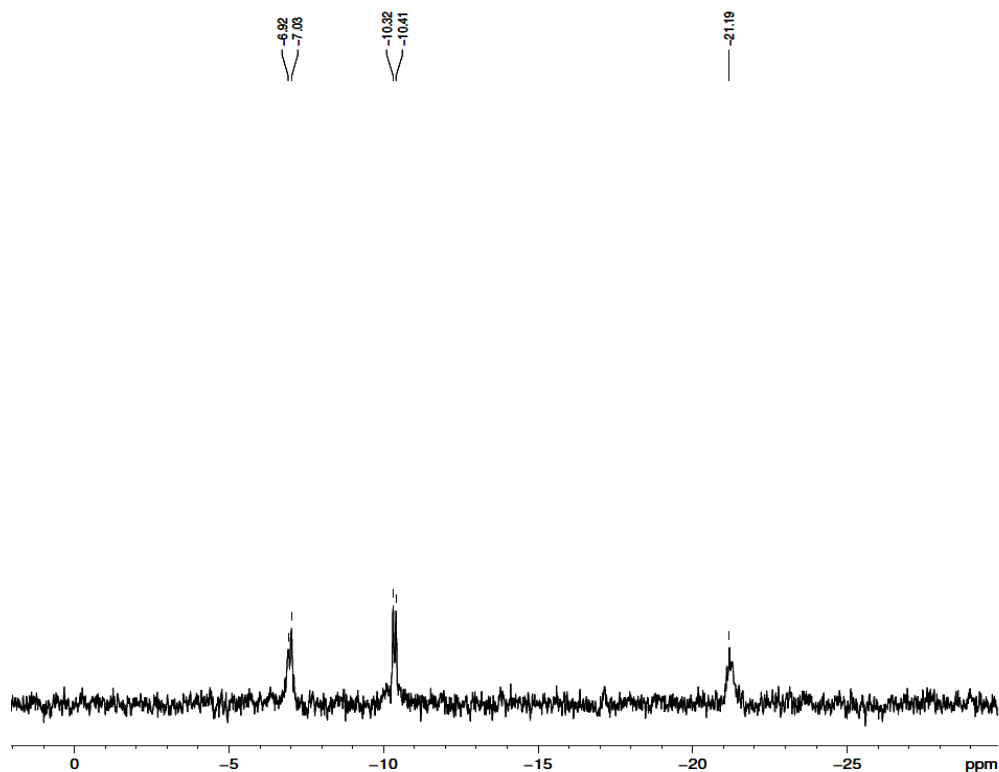

RAINDLOVA VR64-I  
31P NMR in D2O  
pH=7.1 phosphate buffer  
17-02-09 RA

Current Data Parameters  
NAME: RAINDLOVA\_VR64-I  
EXPNO: 10  
PROCNO: 1

F2 - Acquisition Parameters  
Date\_: 20090217  
Time\_: 16.45  
INSTRUM: spect  
PROBHD: 5 mm TBO BB-1H  
PULPROG: zgpg30  
TD: 163094  
SOLVENT: D2O  
NS: 233  
DS: 4  
SWH: 81521.742 Hz  
FIDRES: 0.500029 Hz  
AQ: 0.9999919 sec  
RG: 25100  
DW: 6.133 usec  
DE: 6.00 usec  
TE: 298.1 K  
D1: 2.00000000 sec  
D11: 0.03000000 sec  
TD0: 1

===== CHANNEL f1 =====  
NUC1: 31P  
P1: 7.80 usec  
PL1: -0.50 dB  
PL1W: 93.00663757 W  
SFO1: 202.3288239 MHz

===== CHANNEL f2 =====  
CPDPRG2: waltz16  
NUC2: 1H  
PCPD2: 80.00 usec  
PL2: -2.00 dB  
PL12: 14.71 dB  
PL13: 14.71 dB  
PL2W: 31.94857365 W  
PL12W: 0.67934438 W  
PL13W: 0.67934438 W  
SFO2: 499.8419994 MHz

F2 - Processing parameters  
SI: 131072  
SF: 202.3357495 MHz  
WDW: EM  
SSB: 0  
LB: 3.00 Hz  
GB: 0  
PC: 0.90

39747



## UV Spectra

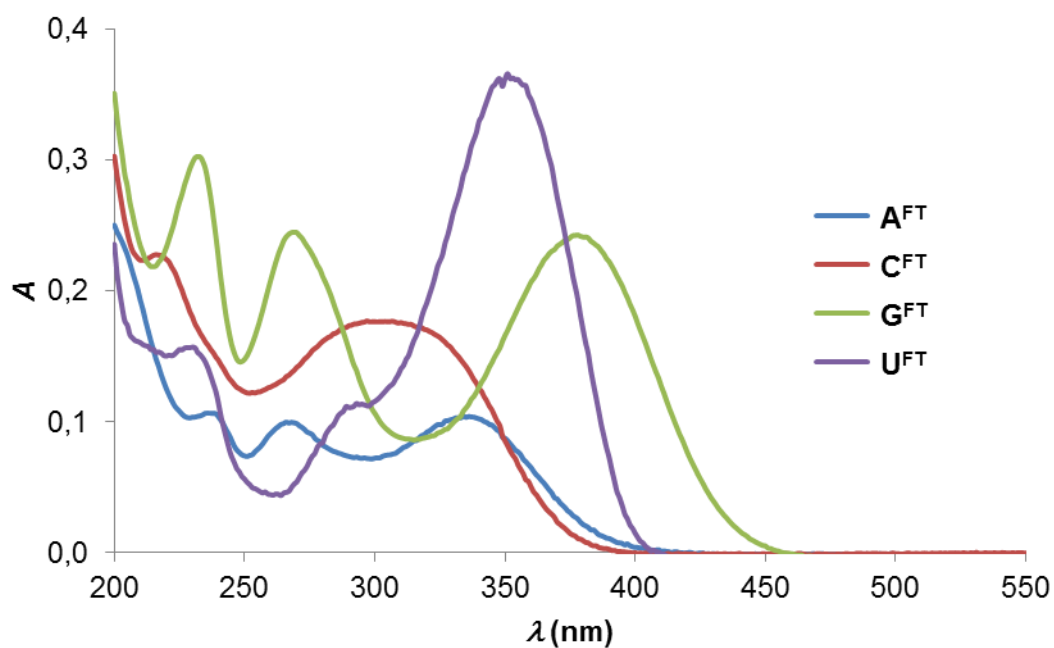

**Figure S5.** UV-VIS spectra of formylthienyl-modified nucleoside triphosphates ( $\mathbf{X}^{\text{FT}}$ ) (20  $\mu\text{M}$  aqueous solutions) in water:  $\mathbf{A}^{\text{FT}}$  ( $\lambda_{\text{abs}} = 334 \text{ nm}$ ,  $\varepsilon = 5\,200 \text{ L mol}^{-1} \text{ cm}^{-1}$ ),  $\mathbf{C}^{\text{FT}}$  ( $\lambda_{\text{abs}} = 297 \text{ nm}$ ,  $\varepsilon = 8\,800 \text{ L mol}^{-1} \text{ cm}^{-1}$ ),  $\mathbf{G}^{\text{FT}}$  ( $\lambda_{\text{abs}} = 378 \text{ nm}$ ,  $\varepsilon = 12\,100 \text{ L mol}^{-1} \text{ cm}^{-1}$ ),  $\mathbf{U}^{\text{FT}}$  ( $\lambda_{\text{abs}} = 351 \text{ nm}$ ,  $\varepsilon = 18\,300 \text{ L mol}^{-1} \text{ cm}^{-1}$ ).

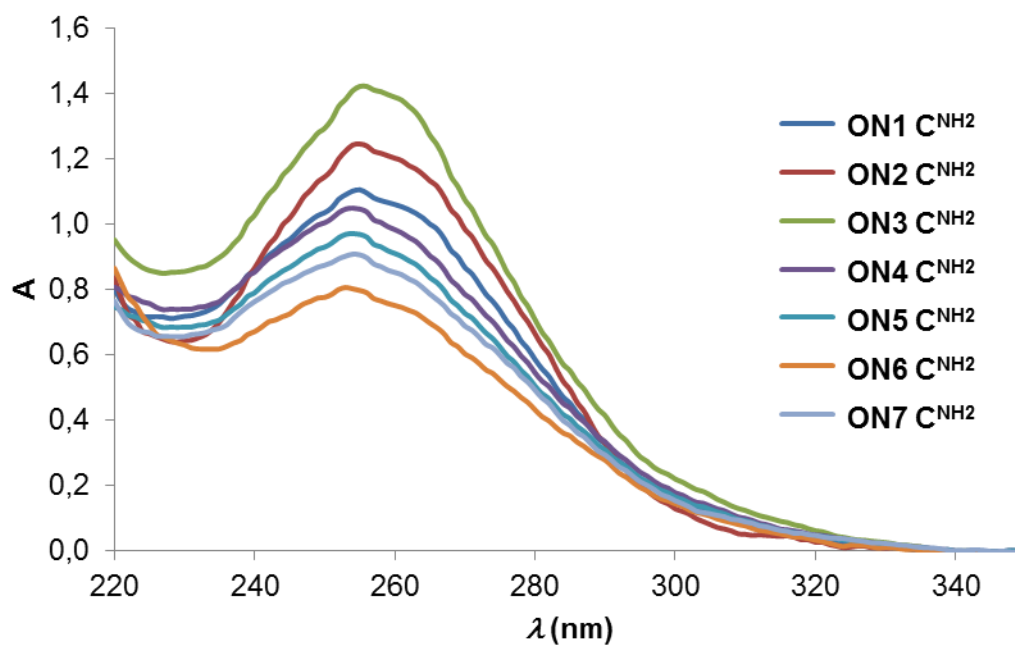

**Figure S6.** UV spectra of prepared  $\mathbf{ON1-7 C}^{\text{NH}_2}$  after HPLC purification.  $\mathbf{ON1-3 C}^{\text{NH}_2}$  (10  $\mu\text{M}$ ),  $\mathbf{ON4-5 C}^{\text{NH}_2}$  (6.5  $\mu\text{M}$ ),  $\mathbf{ON6-7 C}^{\text{NH}_2}$  (4  $\mu\text{M}$ ).

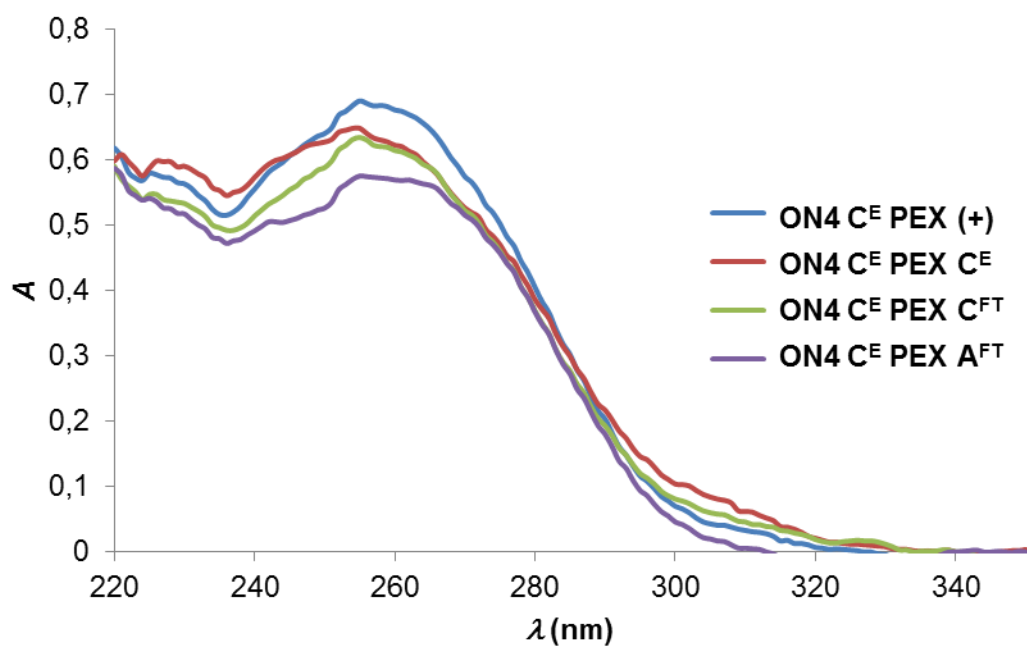

**Figure S7.** UV spectra of PEX products with ethynyl-modified primer **ON4 C<sup>E</sup>**. Aqueous solutions, 2  $\mu$ M.

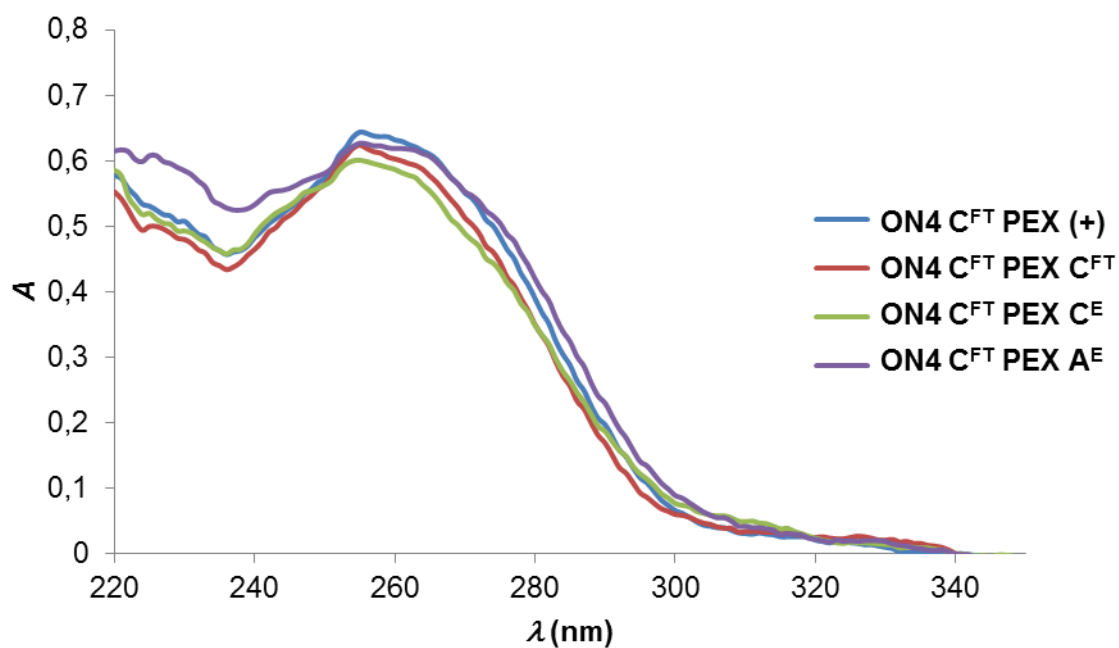

**Figure S8.** UV spectra of PEX products with formylthienyl-modified primer **ON4 C<sup>FT</sup>**. Aqueous solutions, 2  $\mu$ M.

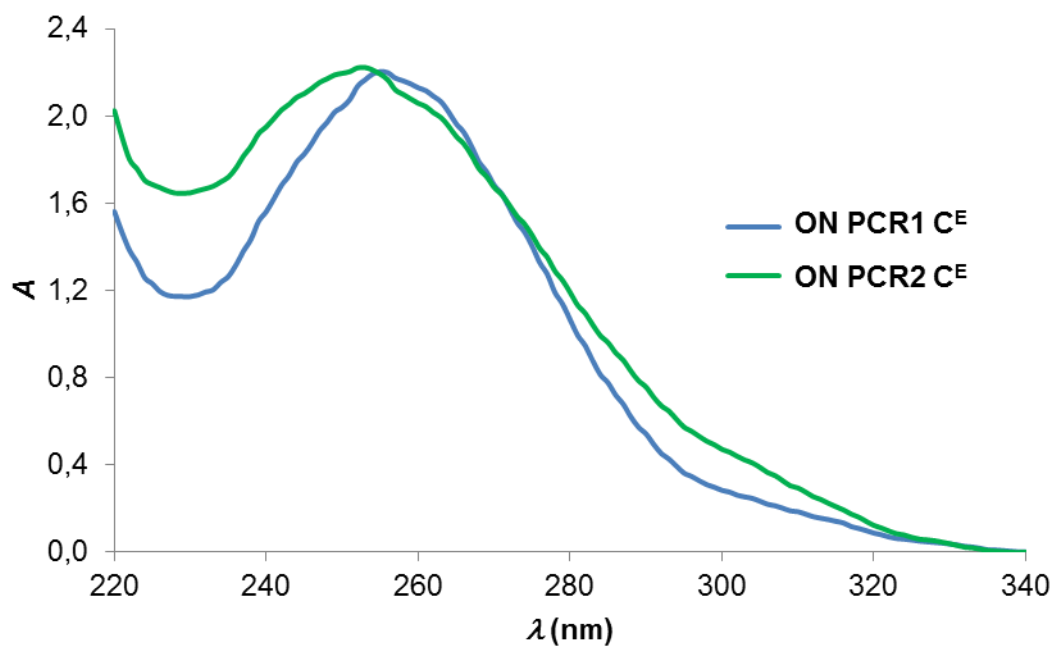

**Figure S9.** UV spectra of ethynyl-modified PCR primers **ON PCR1 C<sup>E</sup>** and **ON PCR2 C<sup>E</sup>**. Aqueous solutions, 10  $\mu$ M.

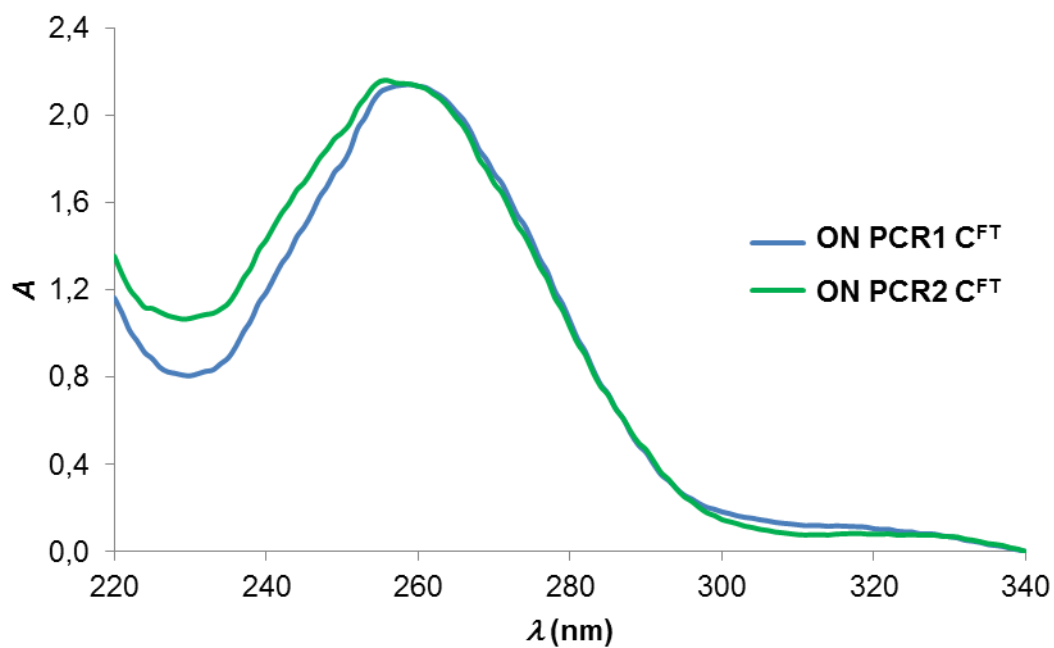

**Figure S10.** UV spectra of formylthienyl-modified PCR primers **ON PCR1 C<sup>FT</sup>** and **ON PCR2 C<sup>FT</sup>**. Aqueous solutions, 10  $\mu$ M.

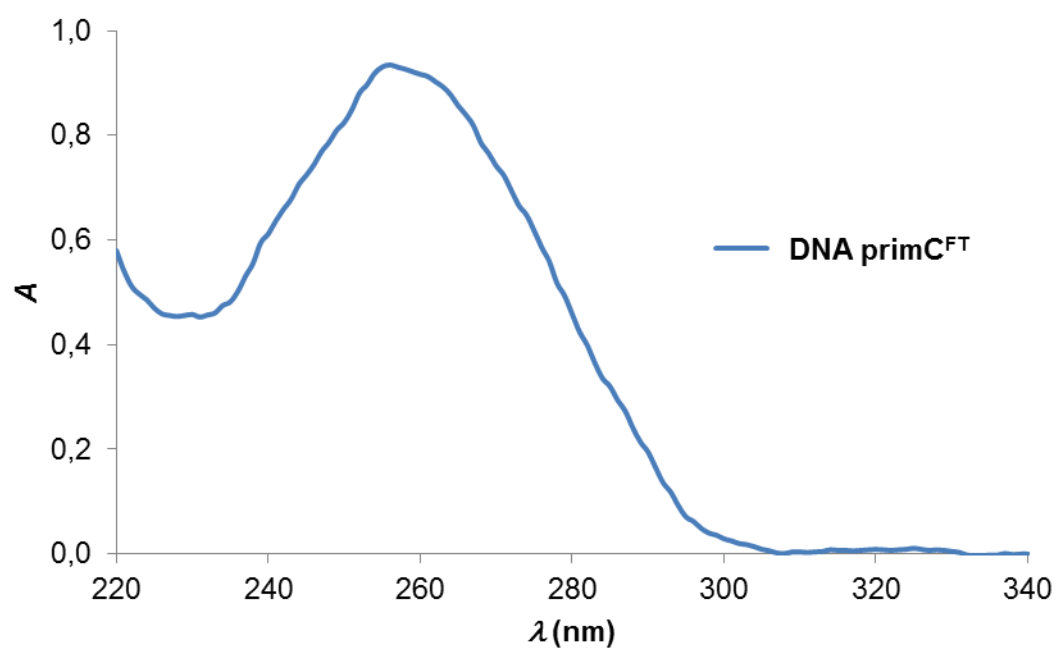

**Figure S11.** UV spectrum of PCR product with formylthienyl-modified primers. Aqueous solutions, 0.6  $\mu\text{M}$  (46  $\text{ng}/\mu\text{L}$ ).

## MALDI-TOF Spectra

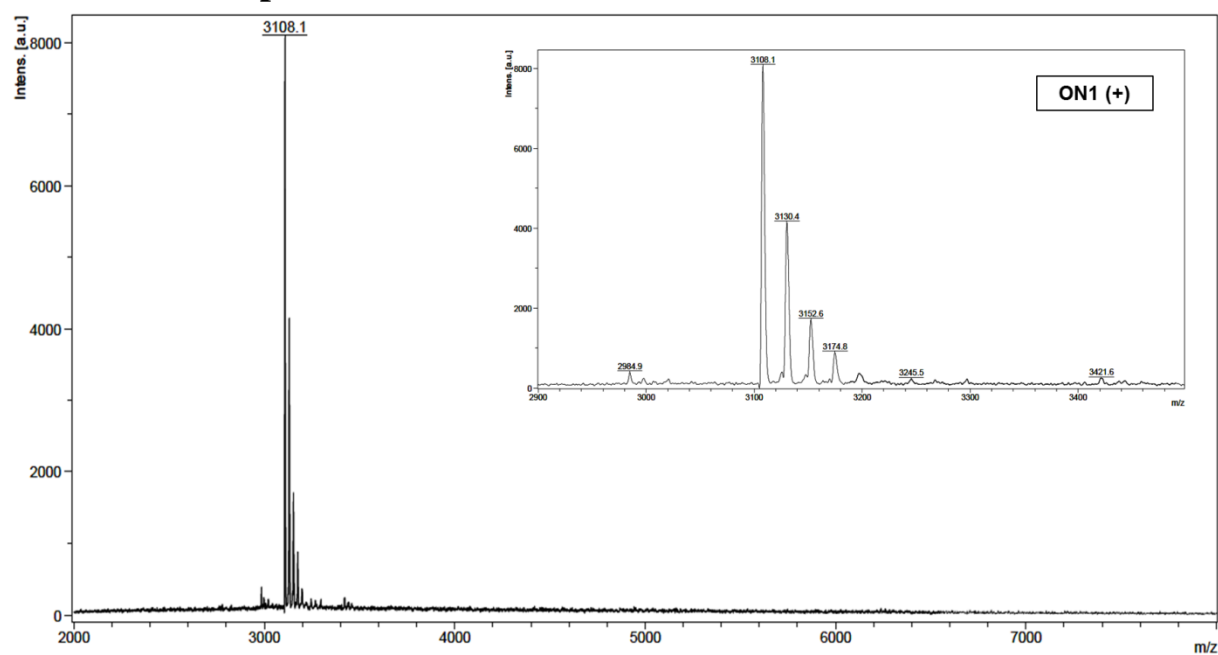

**Figure S12.** MALDI-TOF spectrum of **ON1 (+)**.

M (calc.) = 3 107.0 Da, M (found) = 3 108.1 Da ( $[M+H]^+$ ).

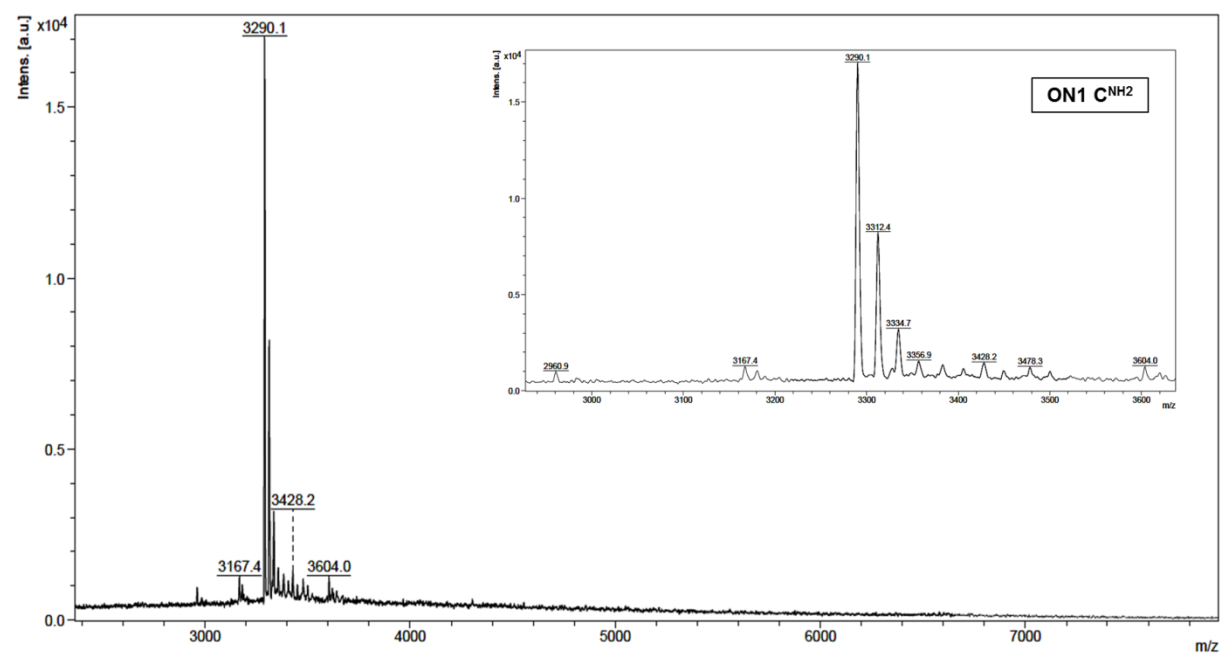

**Figure S13.** MALDI-TOF spectrum of **ON1 C<sup>NH2</sup>**.

M (calc.) = 3 289.2 Da, M (found) = 3 290.1 Da ( $[M+H]^+$ ).

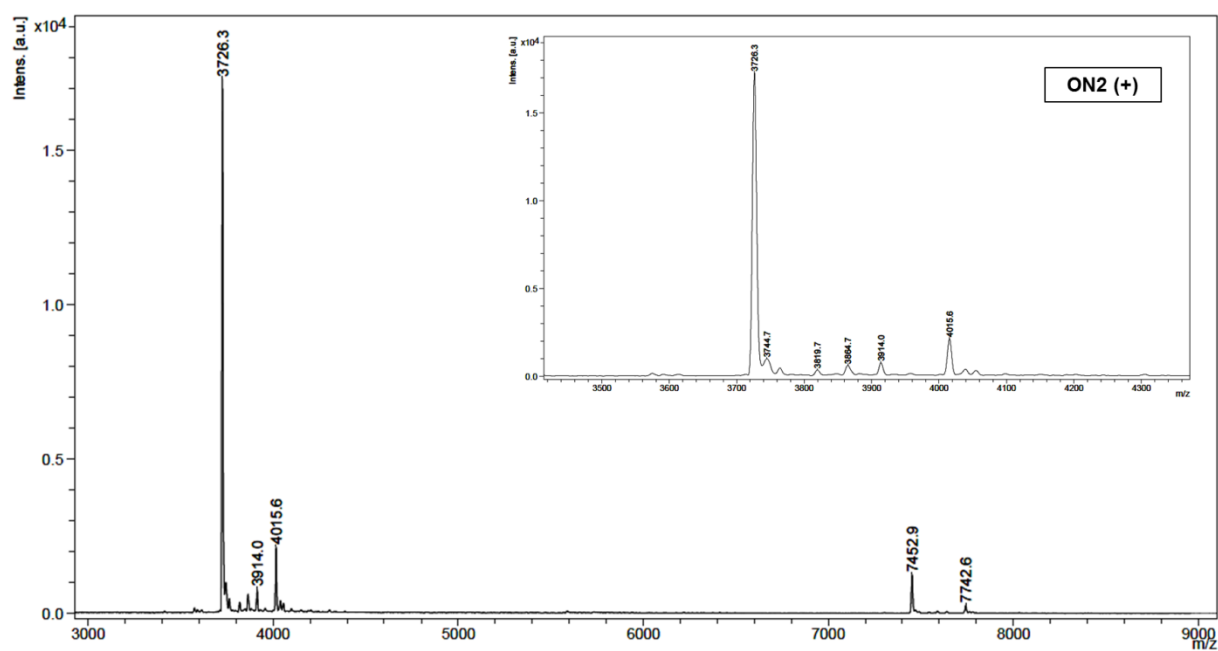

**Figure S14.** MALDI-TOF spectrum of **ON2 (+)**.

M (calc.) = 3 725.4 Da, M (found) = 3 726.3 Da ( $[M+H]^+$ ).

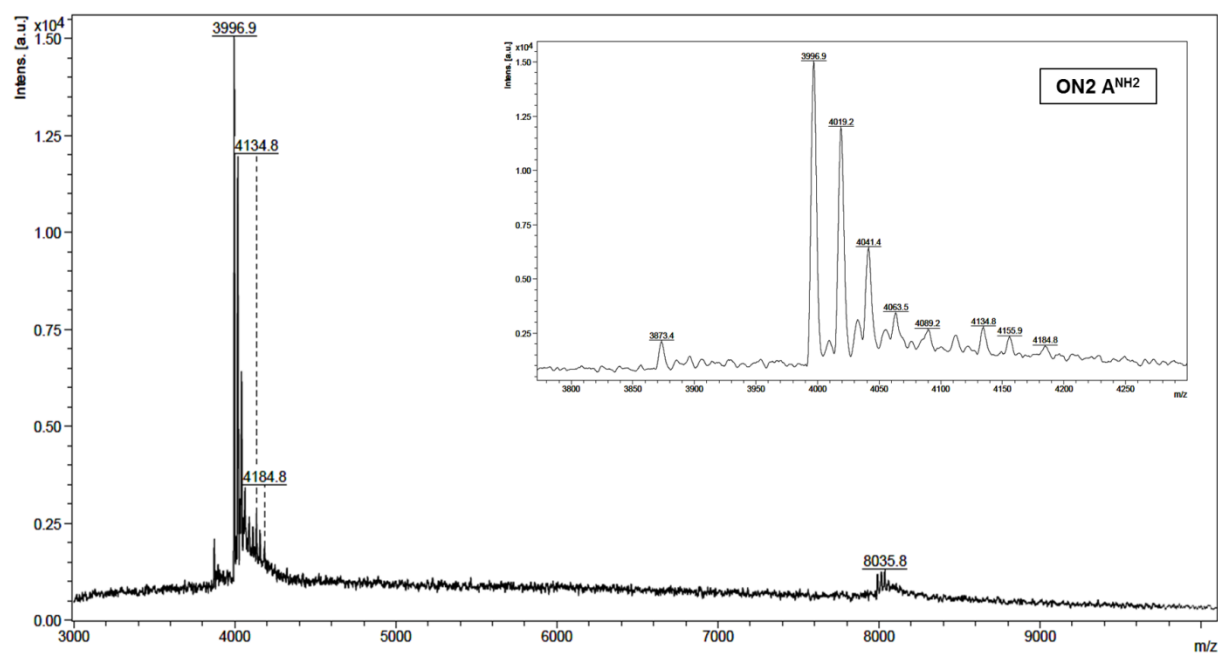

**Figure S15.** MALDI-TOF spectrum of **ON2 A<sup>NH2</sup>**.

M (calc.) = 3 995.8 Da, M (found) = 3 996.9 Da ( $[M+H]^+$ ).

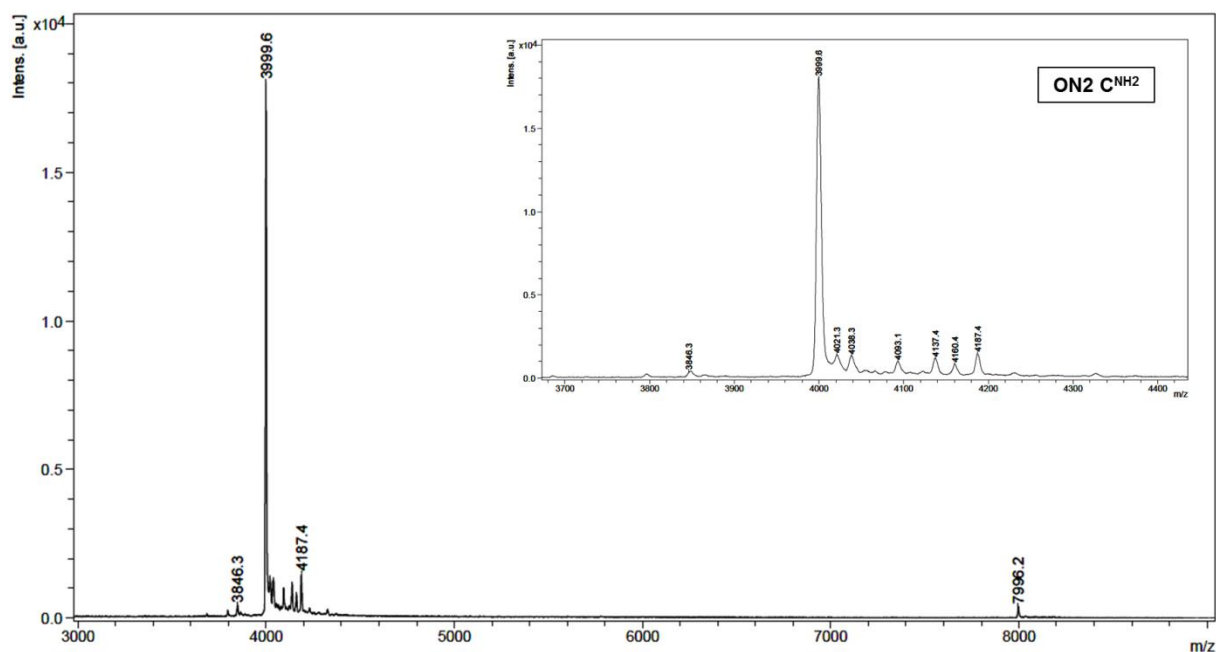

**Figure S16.** MALDI-TOF spectrum of **ON2 C<sup>NH2</sup>**.

M (calc.) = 3 998.7 Da, M (found) = 3 999.6 Da ( $[M+H]^+$ ).

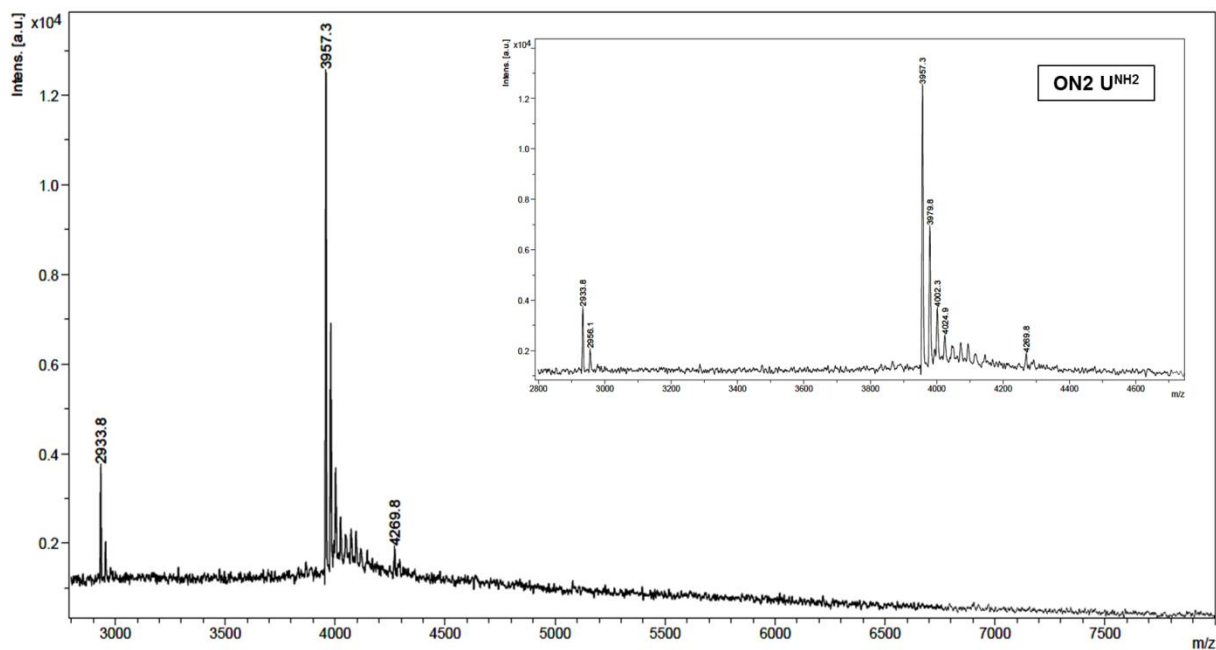

**Figure S17.** MALDI-TOF spectrum of **ON2 U<sup>NH2</sup>**.

M (calc.) = 3 955.7 Da, M (found) = 3 957.3 Da ( $[M+H]^+$ ).

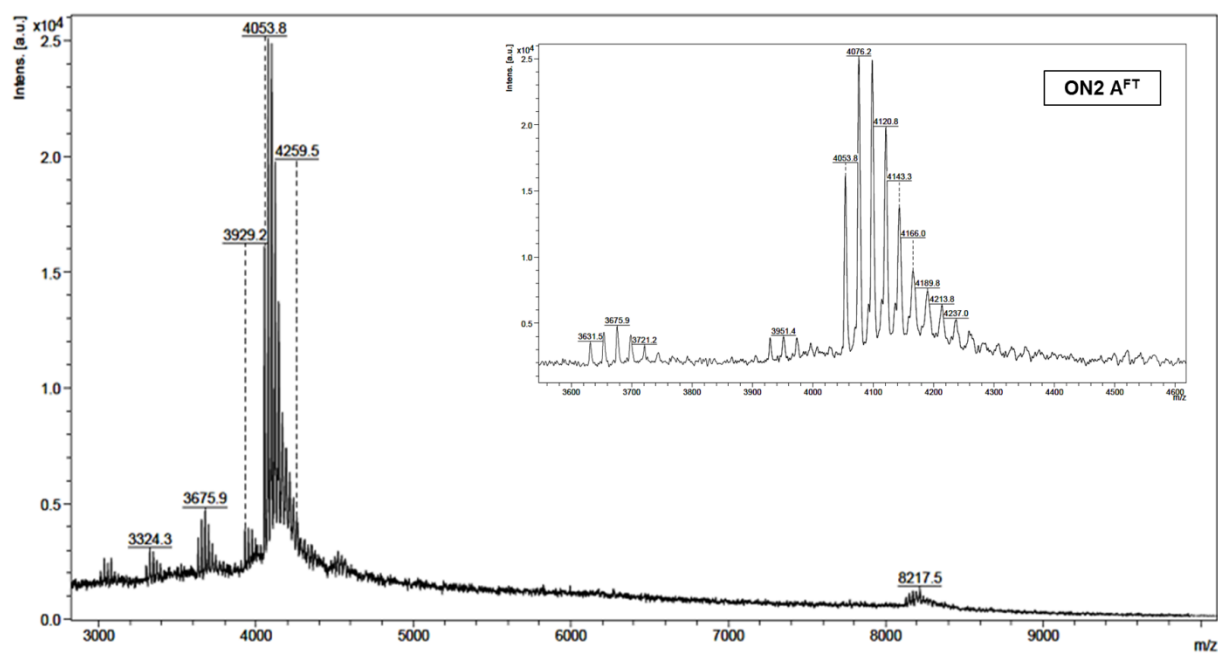

**Figure S18.** MALDI-TOF spectrum of **ON2 A<sup>FT</sup>**.

M (calc.) = 4 052.8 Da, M (found) = 4 053.8 Da ( $[M+H]^+$ ).

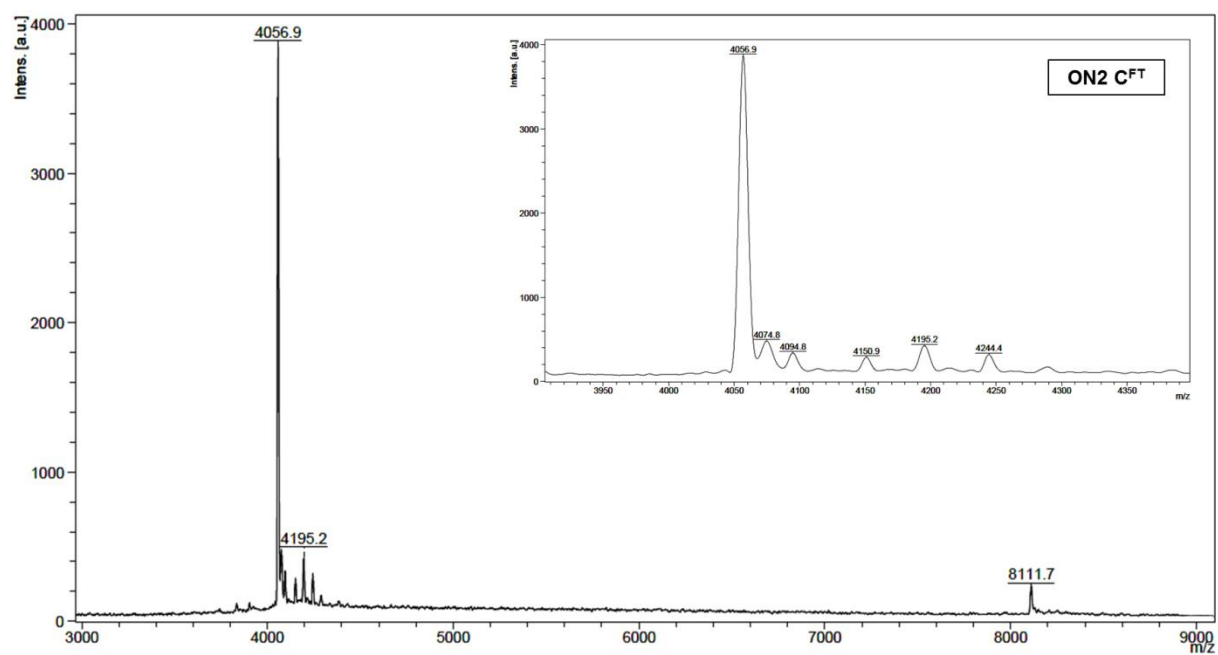

**Figure S19.** MALDI-TOF spectrum of **ON2 C<sup>FT</sup>**.

M (calc.) = 4 055.8 Da, M (found) = 4 056.9 Da ( $[M+H]^+$ ).



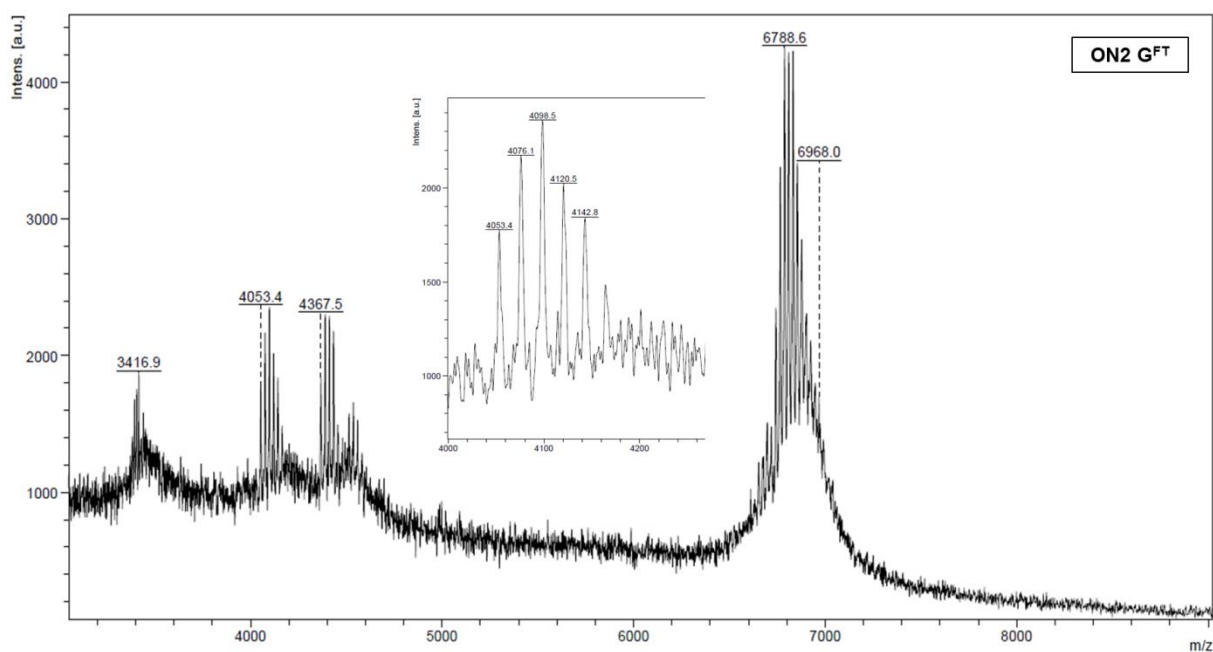

**Figure S20.** MALDI-TOF spectrum of **ON2 G<sup>FT</sup>**.

M (calc.) = 4 052.8 Da, M (found) = 4 053.4 Da ( $[M+H]^+$ ), 4 367.5 Da ( $[M+A+H]^+$ ), 6 788.6 Da (?).

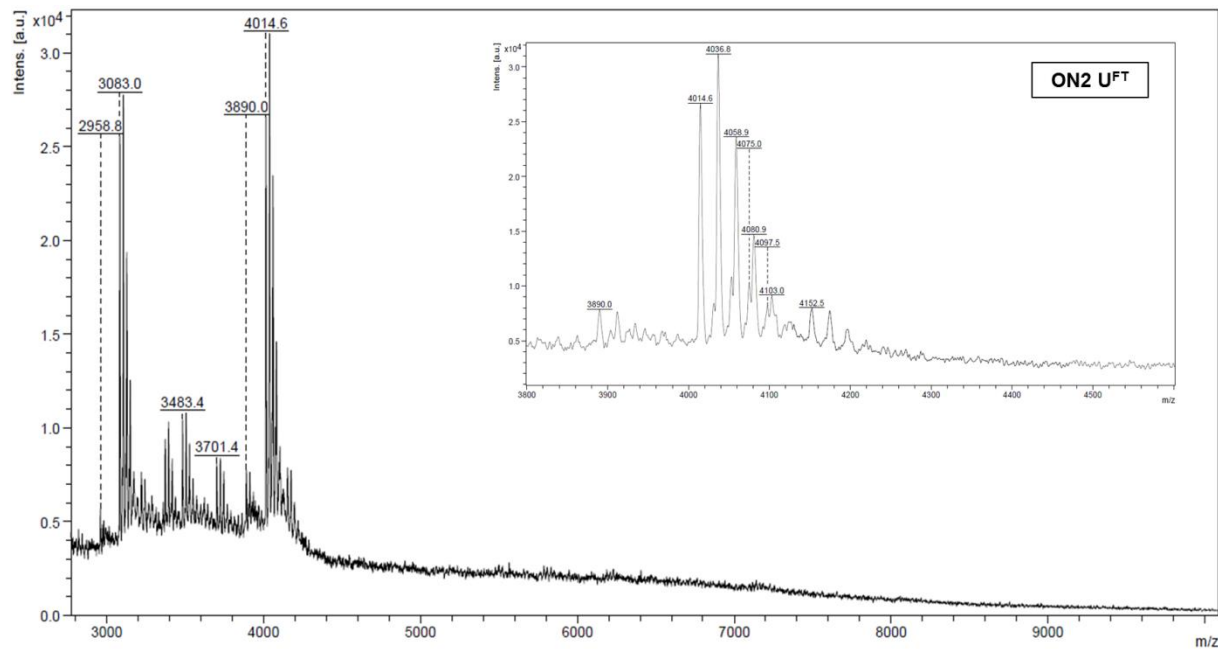

**Figure S21.** MALDI-TOF spectrum of **ON2 U<sup>FT</sup>**.

M (calc.) = 4 013.7 Da, M (found) = 4 014.6 Da ( $[M+H]^+$ ), 3 083.0 Da (9-mer,  $[M - C - G - A + H]^+$ ).

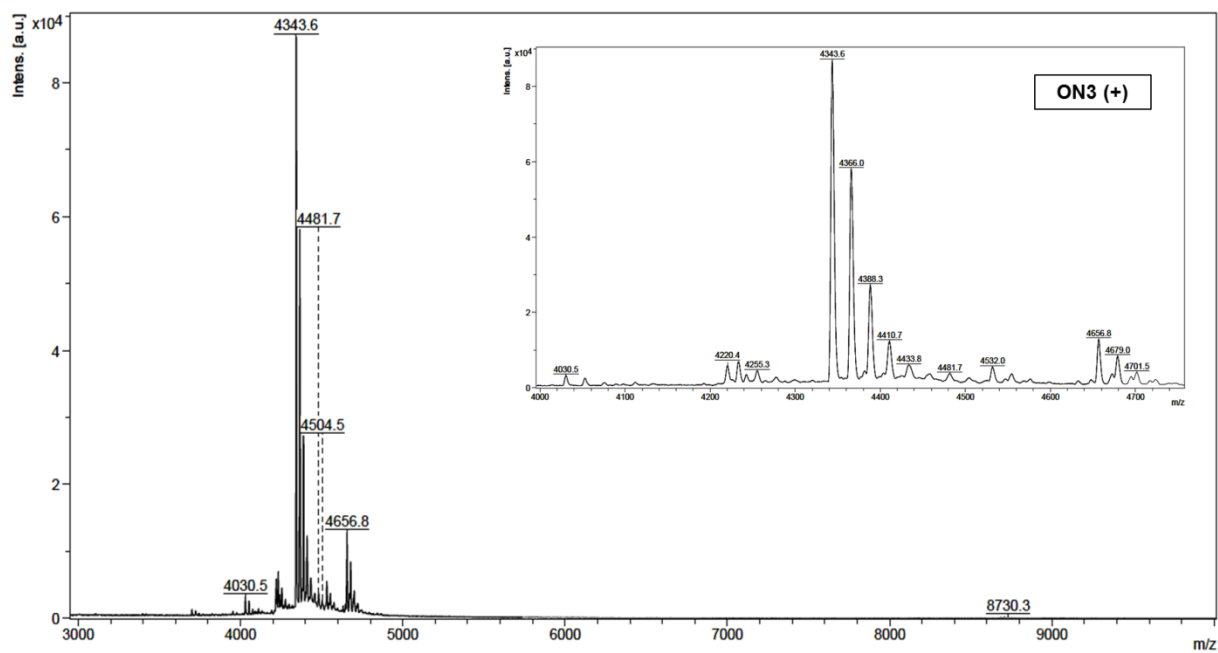

**Figure S22.** MALDI-TOF spectrum of **ON3 (+)**.

M (calc.) = 4 342.8 Da, M (found) = 4 343.6 Da ( $[M+H]^+$ ).

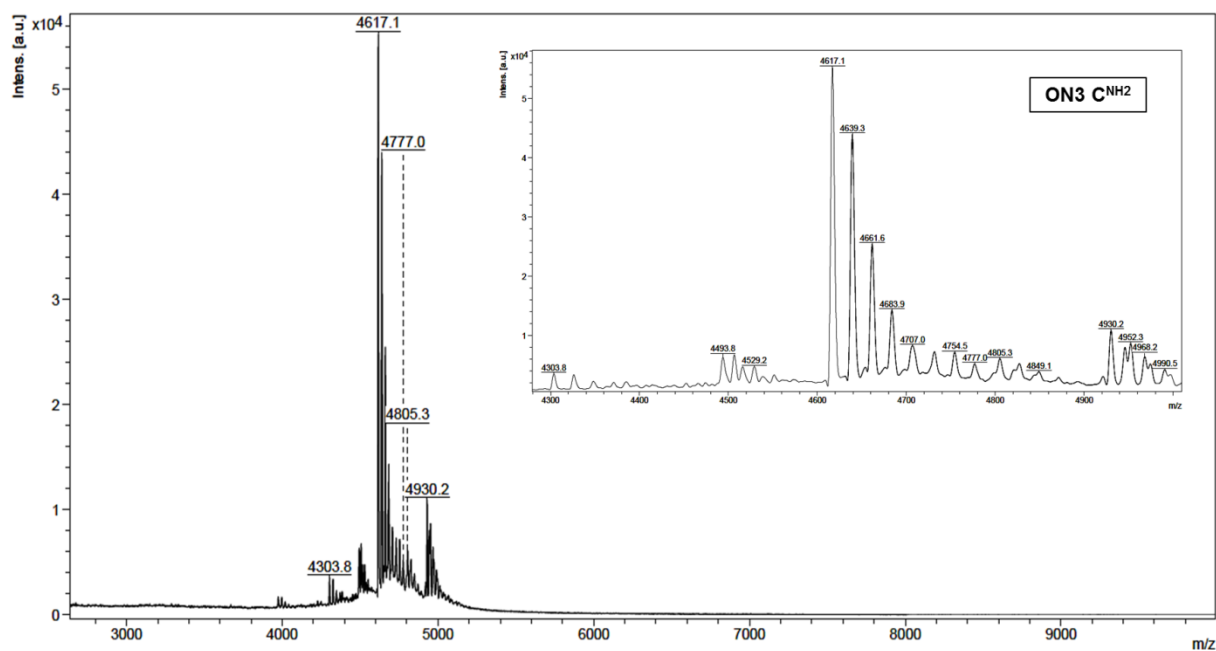

**Figure S23.** MALDI-TOF spectrum of **ON3 C<sup>NH2</sup>**.

M (calc.) = 4 616.2 Da, M (found) = 4 617.1 Da ( $[M+H]^+$ ).

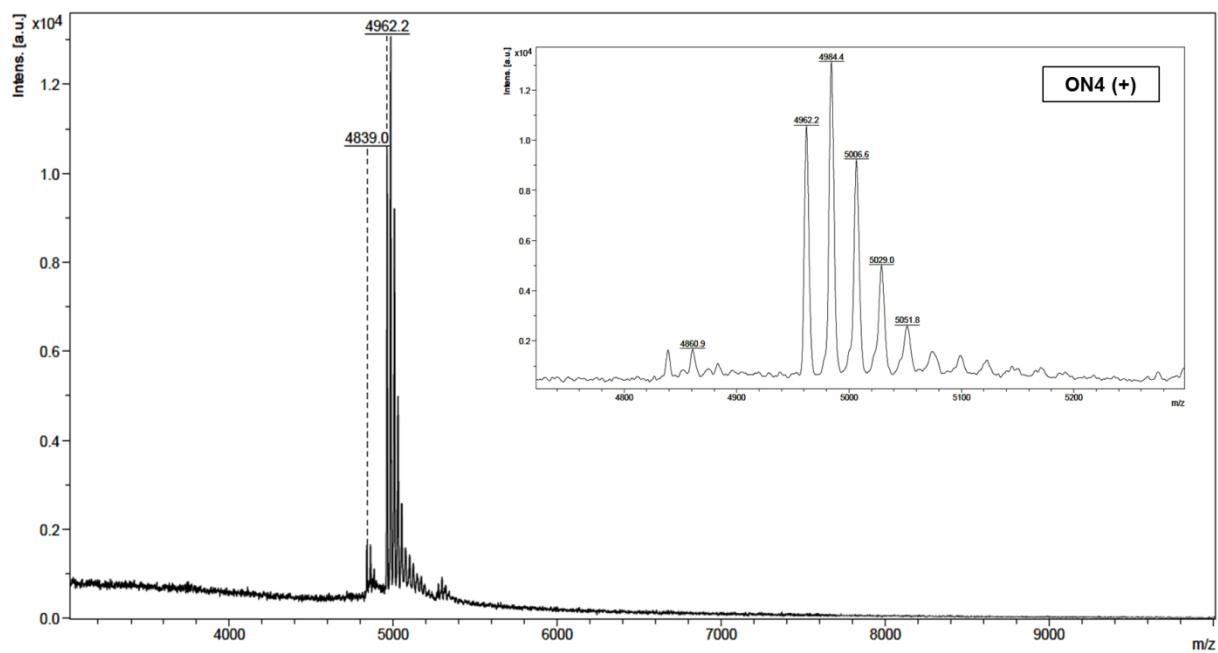

**Figure S24.** MALDI-TOF spectrum of **ON4 (+)**.

M (calc.) = 4 961.2 Da, M (found) = 4 962.2 Da ( $[M+H]^+$ ).

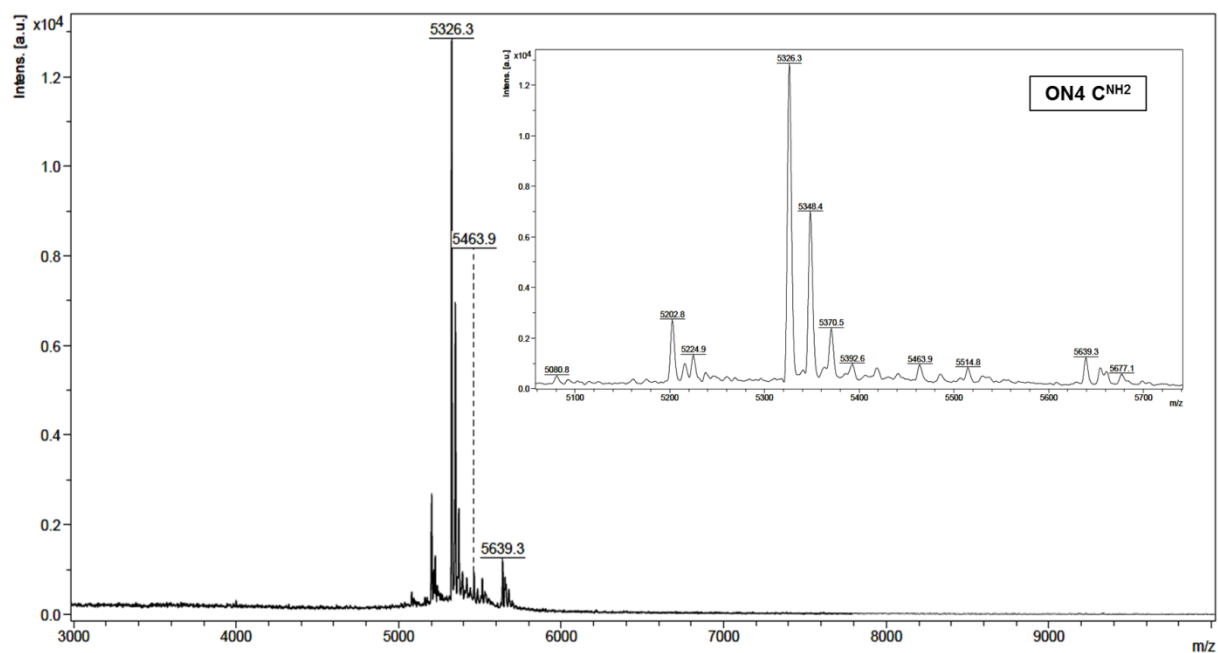

**Figure S25.** MALDI-TOF spectrum of **ON4 C<sup>NH2</sup>**.

M (calc.) = 5 325.7 Da, M (found) = 5 326.3 Da ( $[M+H]^+$ ).

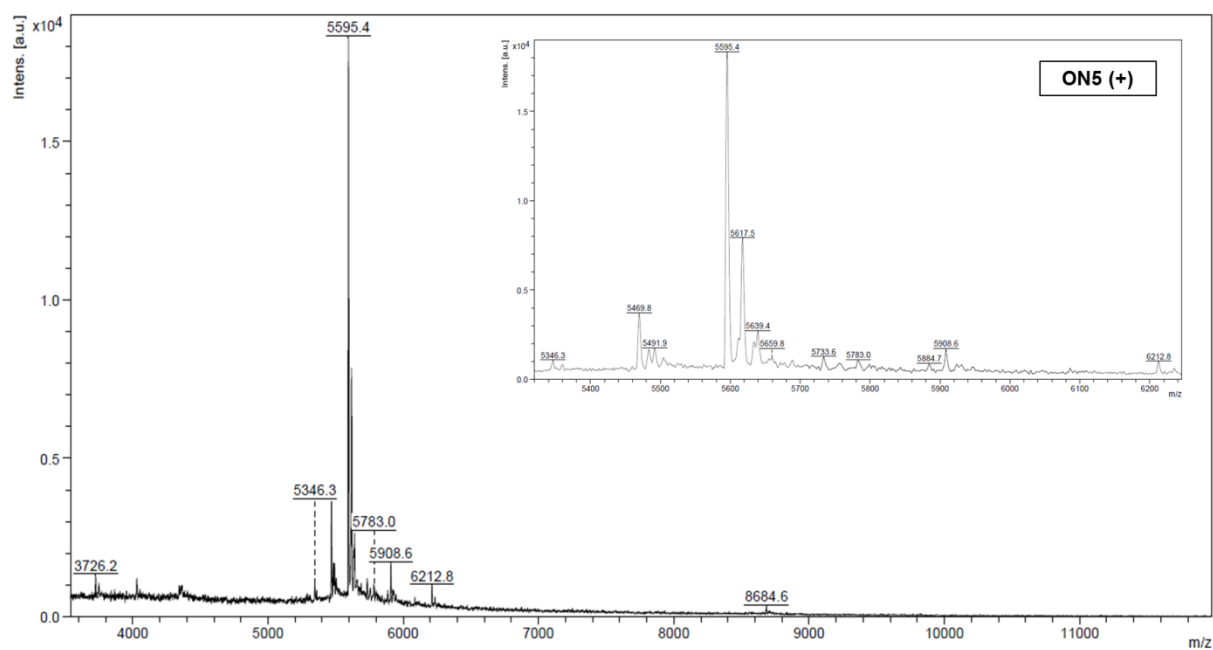

**Figure S26.** MALDI-TOF spectrum of **ON5 (+)**.

M (calc.) = 5 594.6 Da, M (found) = 5 595.4 Da ( $[M+H]^+$ ).

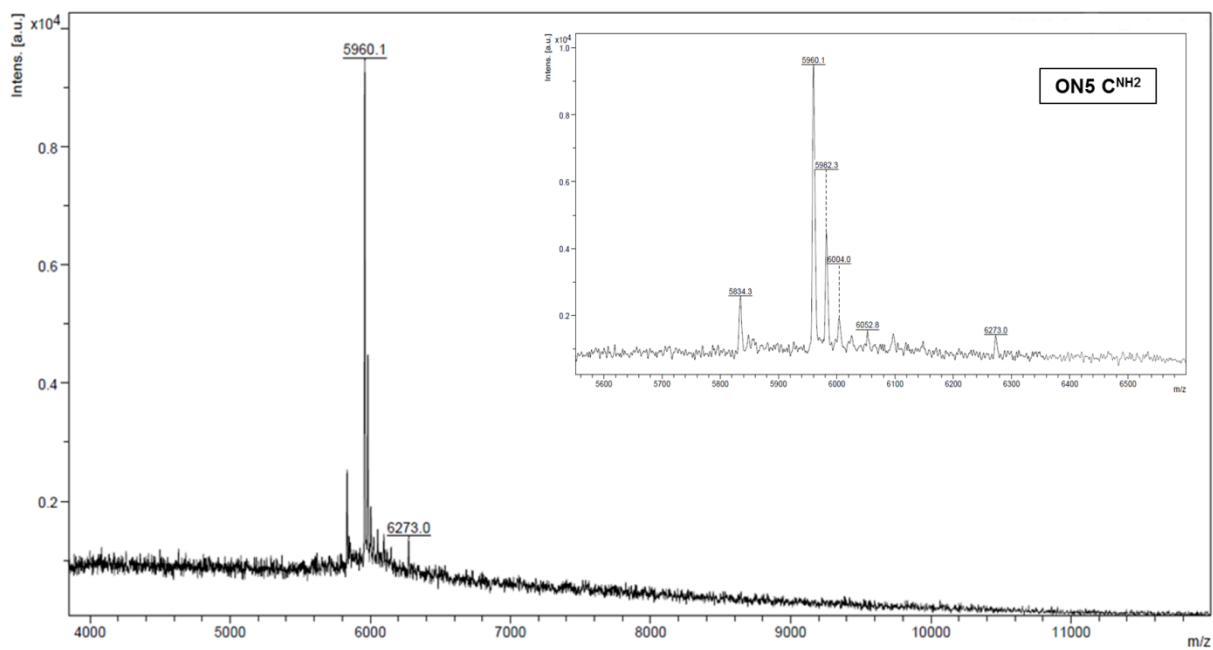

**Figure S27.** MALDI-TOF spectrum of **ON5 C<sup>NH2</sup>**.

M (calc.) = 5 959.1 Da, M (found) = 5 960.1 Da ( $[M+H]^+$ ).

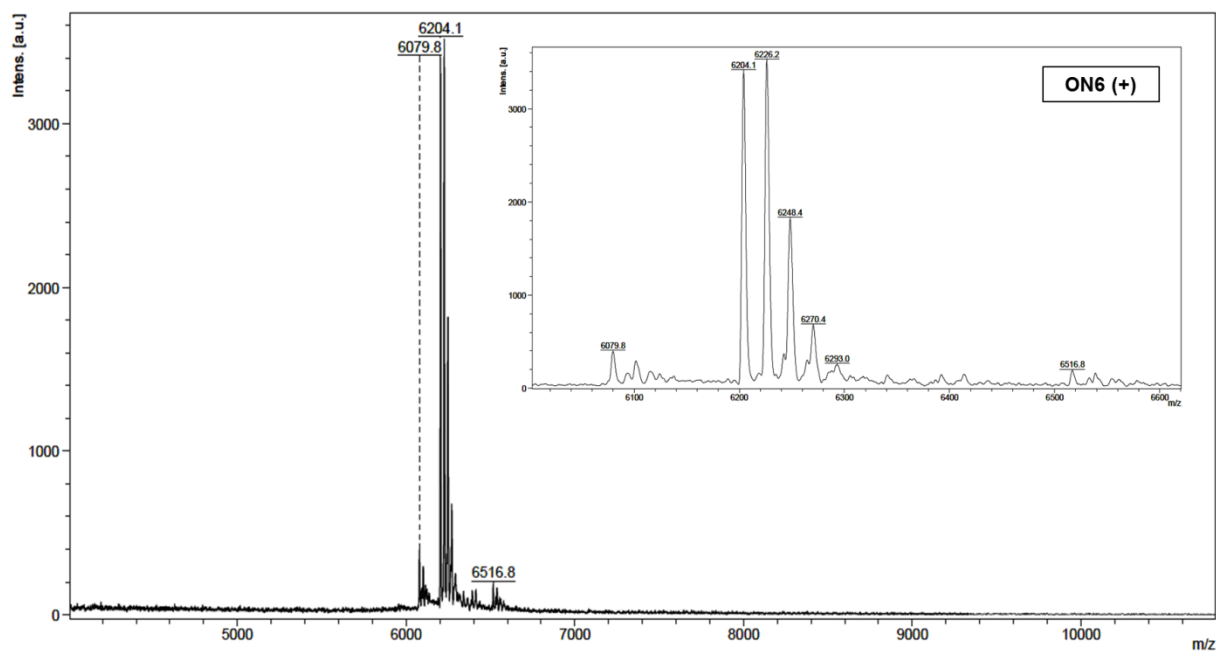

**Figure S28.** MALDI-TOF spectrum of **ON6 (+)**.

M (calc.) = 6 203.0 Da, M (found) = 6 204.1 Da ( $[M+H]^+$ ).

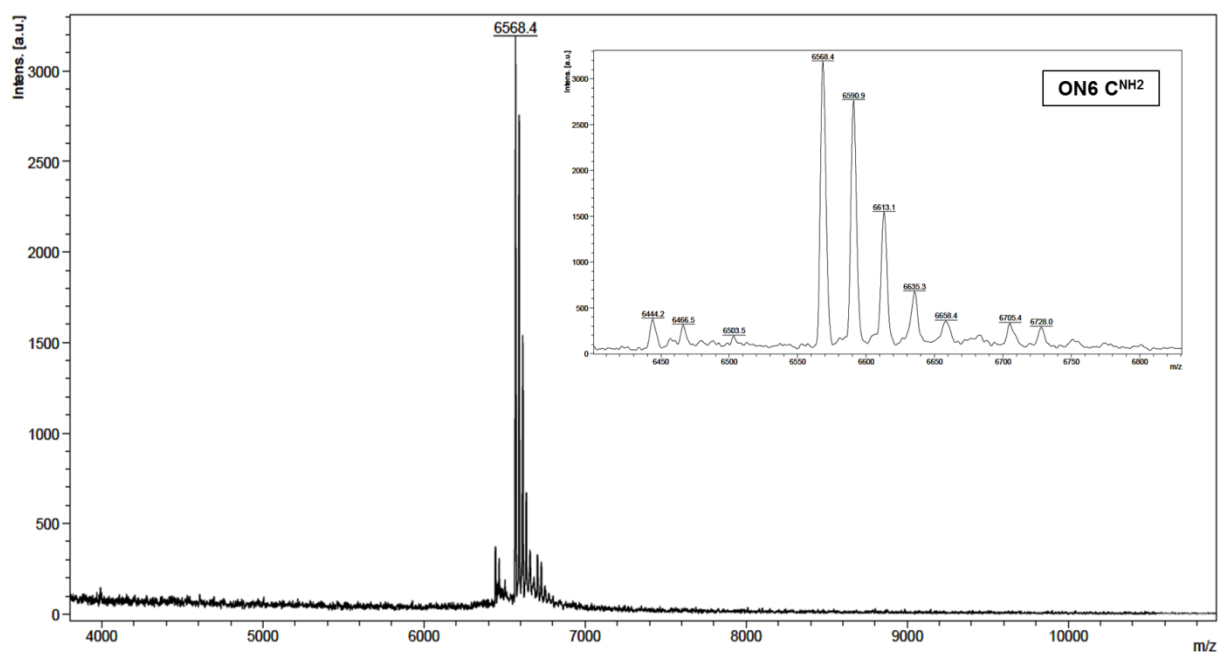

**Figure S29.** MALDI-TOF spectrum of **ON6 C<sup>NH2</sup>**.

M (calc.) = 6 567.5 Da, M (found) = 6 568.4 Da ( $[M+H]^+$ ).

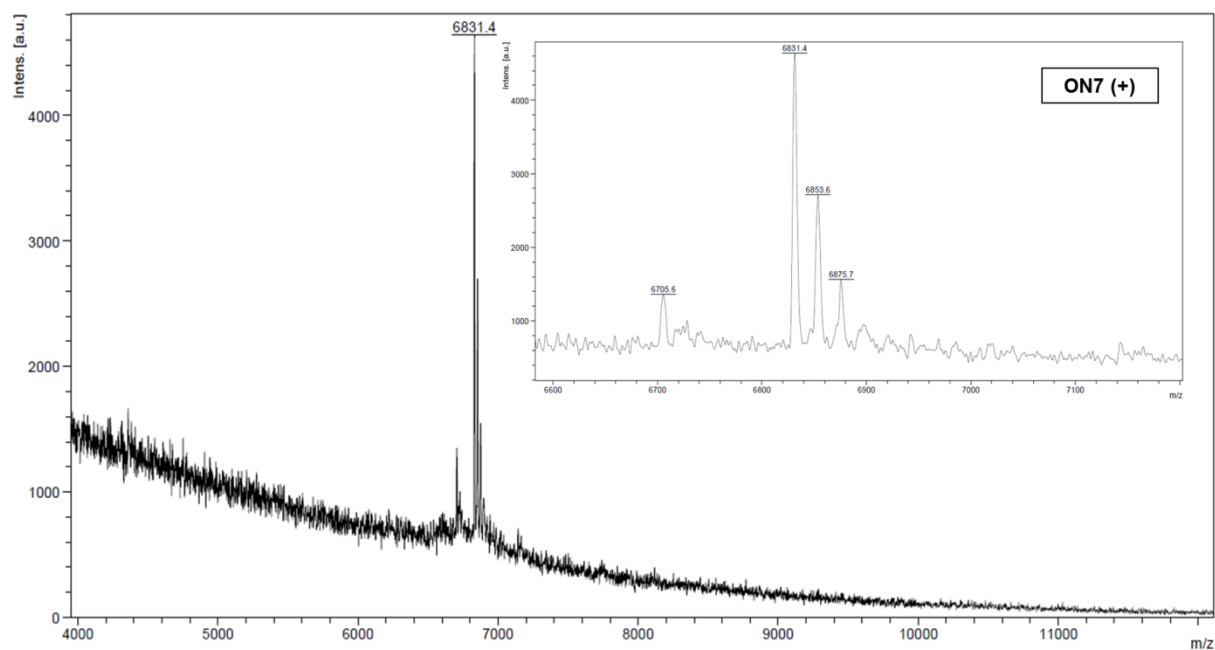

**Figure S30.** MALDI-TOF spectrum of **ON7 (+)**.

M (calc.) = 6 830.4 Da, M (found) = 6 831.4 Da ( $[M+H]^+$ ).

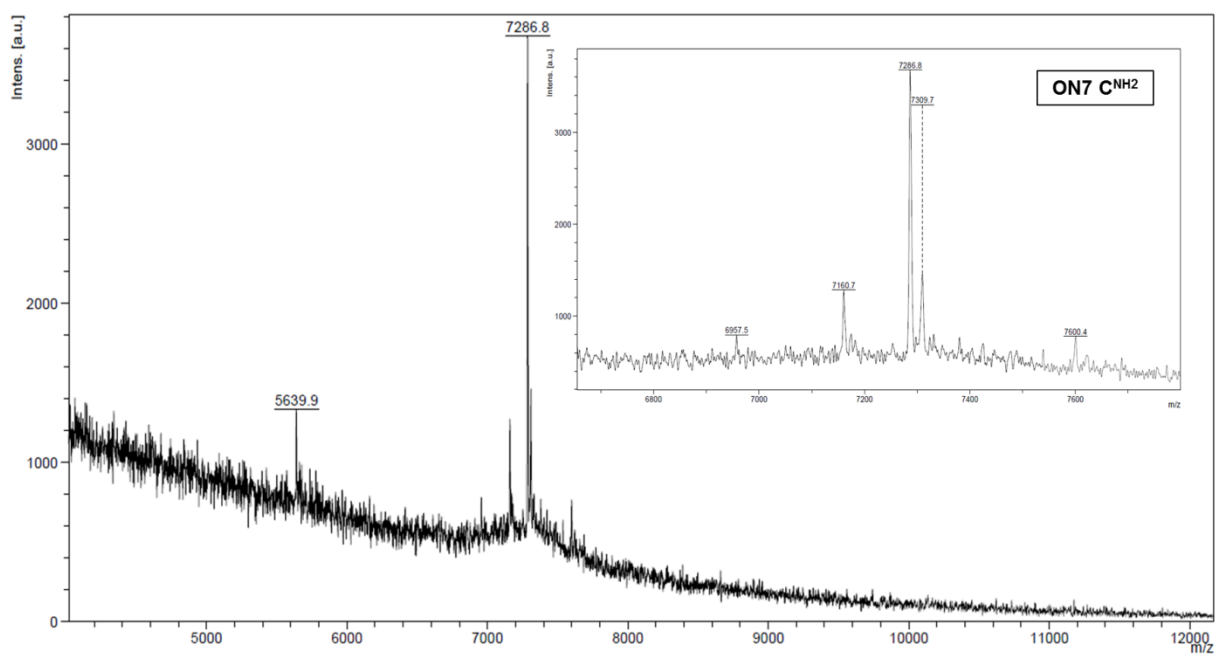

**Figure S31.** MALDI-TOF spectrum of **ON7 C<sup>NH2</sup>**.

M (calc.) = 7 286.0 Da, M (found) = 7 286.8 Da ( $[M+H]^+$ ).

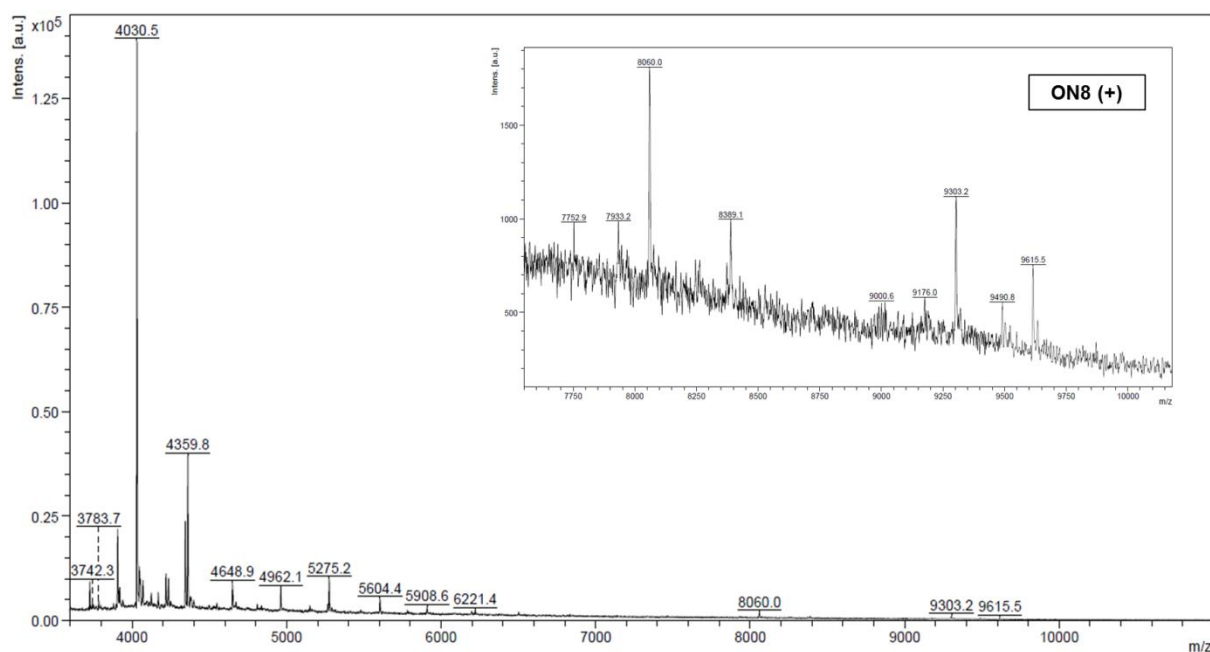

**Figure S32.** MALDI-TOF spectrum of **ON8 (+)**.

M (calc.) = 9 302.0 Da, M (found) = 9 303.2 Da ( $[M+H]^+$ ), plus a mixture of shorter ONs (mainly 13-mer and 14-mer).

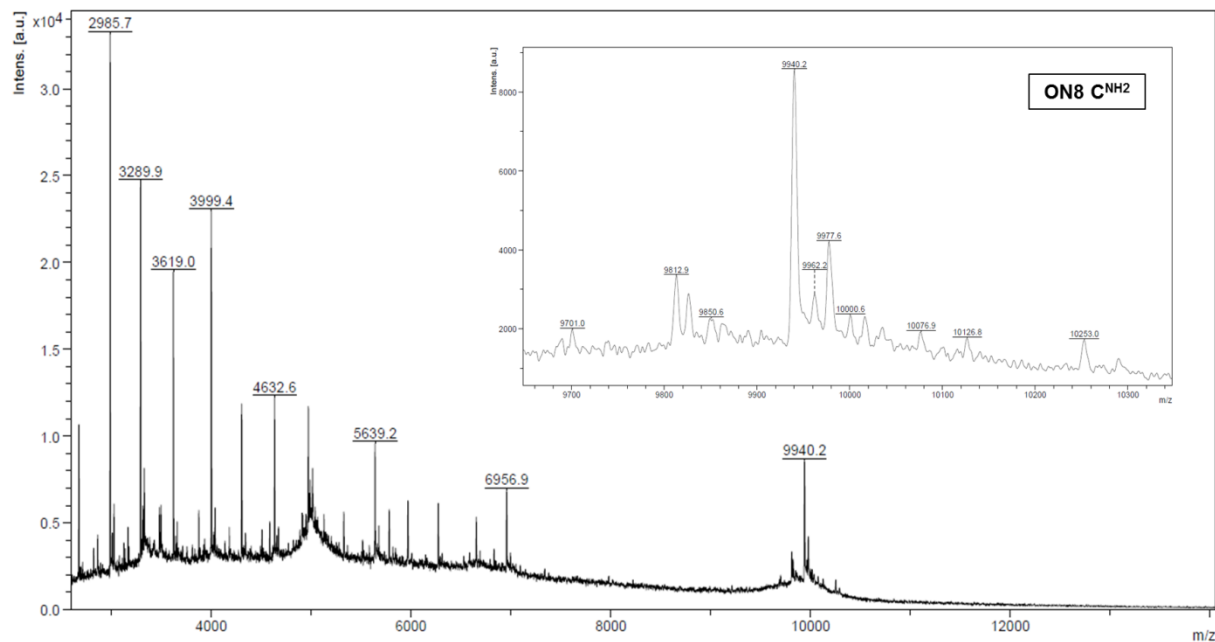

**Figure S33.** MALDI-TOF spectrum of **ON8 C<sup>NH2</sup>**.

M (calc.) = 9 939.8 Da, M (found) = 9 940.2 Da ( $[M+H]^+$ ), plus a mixture of shorter ONs.

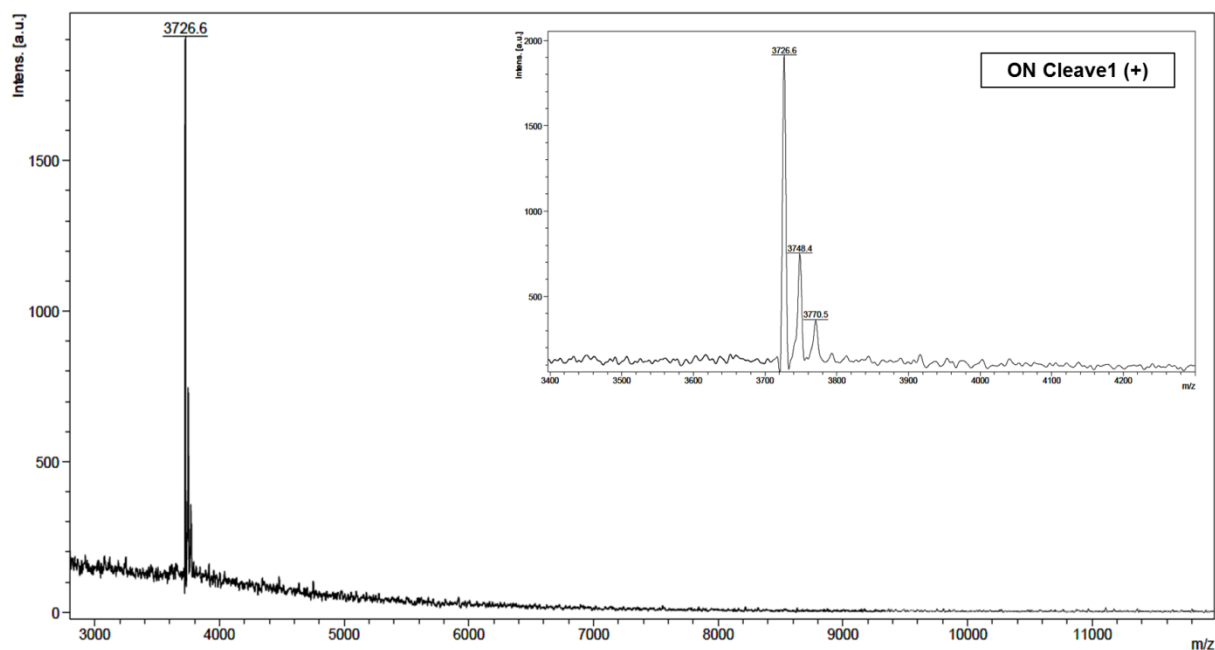

**Figure S34.** MALDI-TOF spectrum of **ON Cleave1 (+)**.

M (calc.) = 3 725.4 Da, M (found) = 3 726.6 Da ( $[M+H]^+$ ).

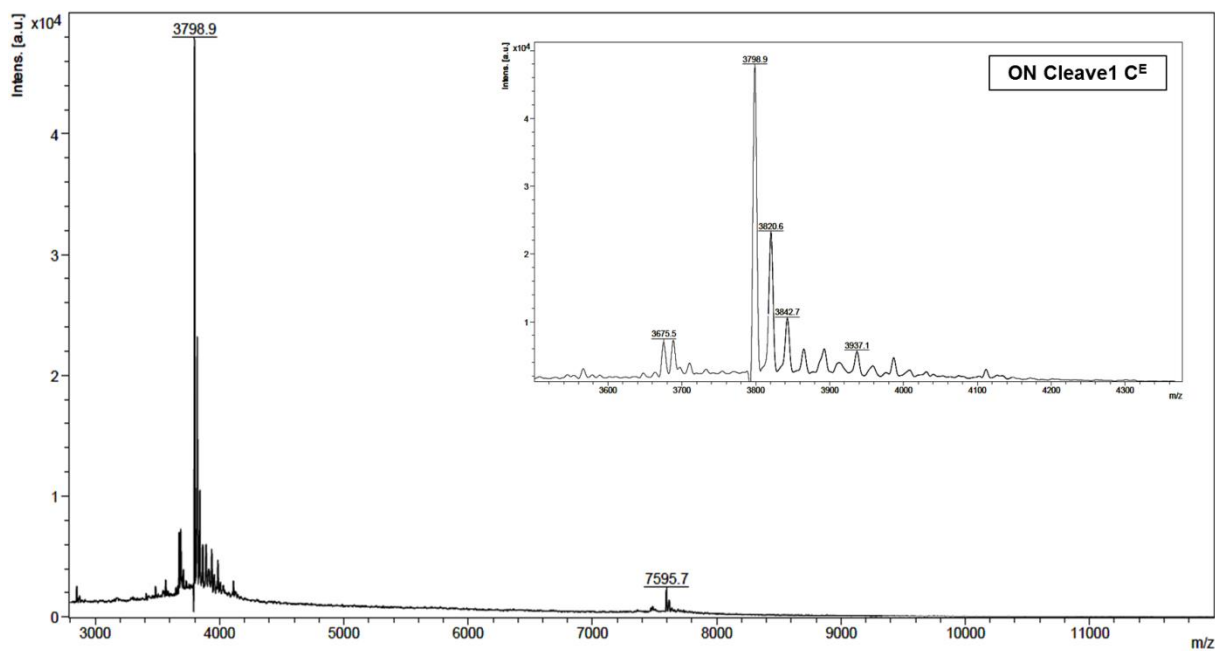

**Figure S35.** MALDI-TOF spectrum of **ON Cleave1 C<sup>E</sup>**.

M (calc.) = 3 797.5 Da, M (found) = 3 798.9 Da ( $[M+H]^+$ ).



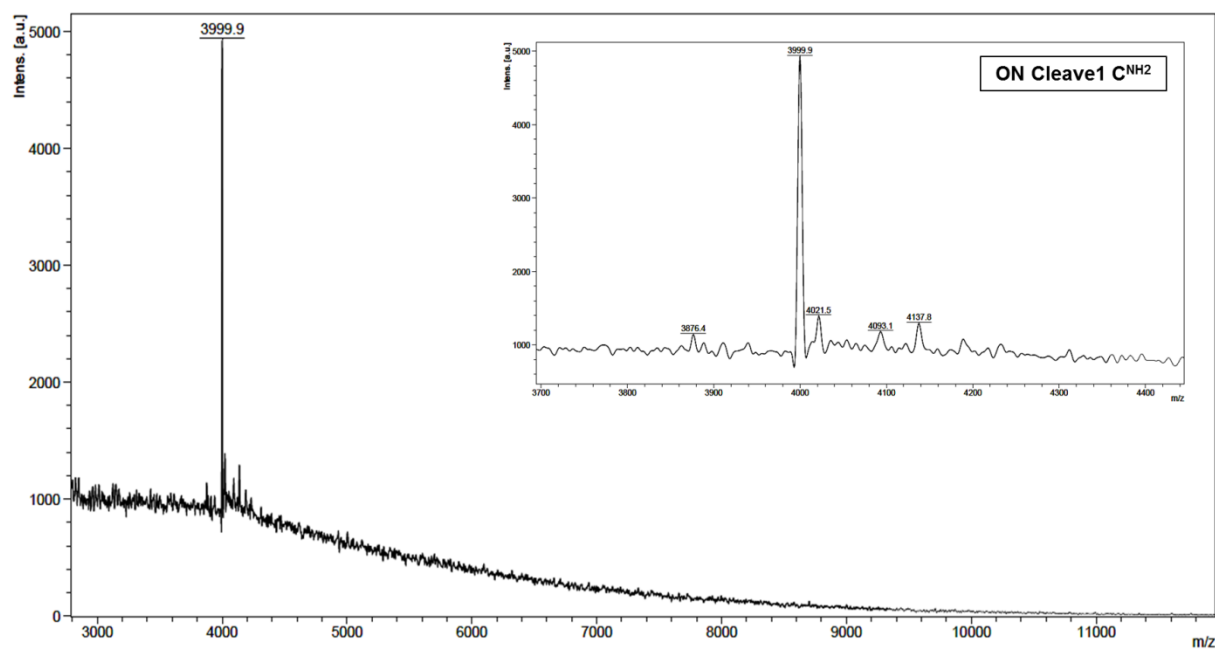

**Figure S36.** MALDI-TOF spectrum of **ON Cleave1 C<sup>NH2</sup>**.

M (calc.) = 3 998.8 Da, M (found) = 3 999.9 Da ( $[M+H]^+$ ).

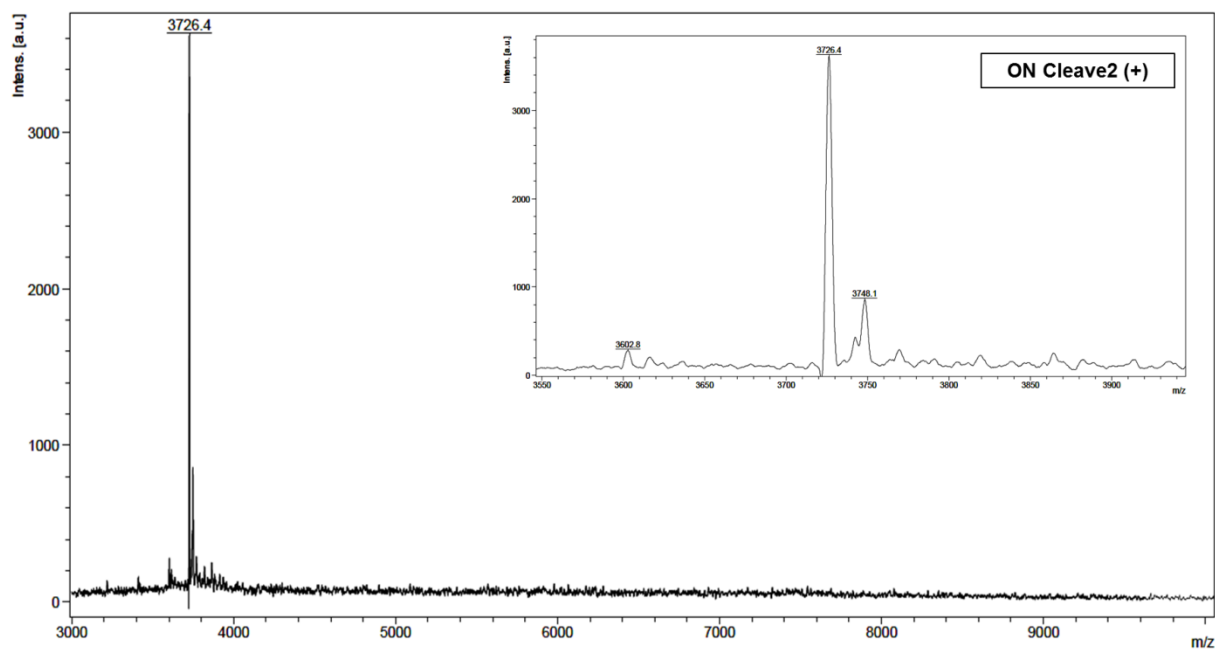

**Figure S37.** MALDI-TOF spectrum of **ON Cleave2 (+)**.

M (calc.) = 3 725.4 Da, M (found) = 3 726.4 ( $[M+H]^+$ ).

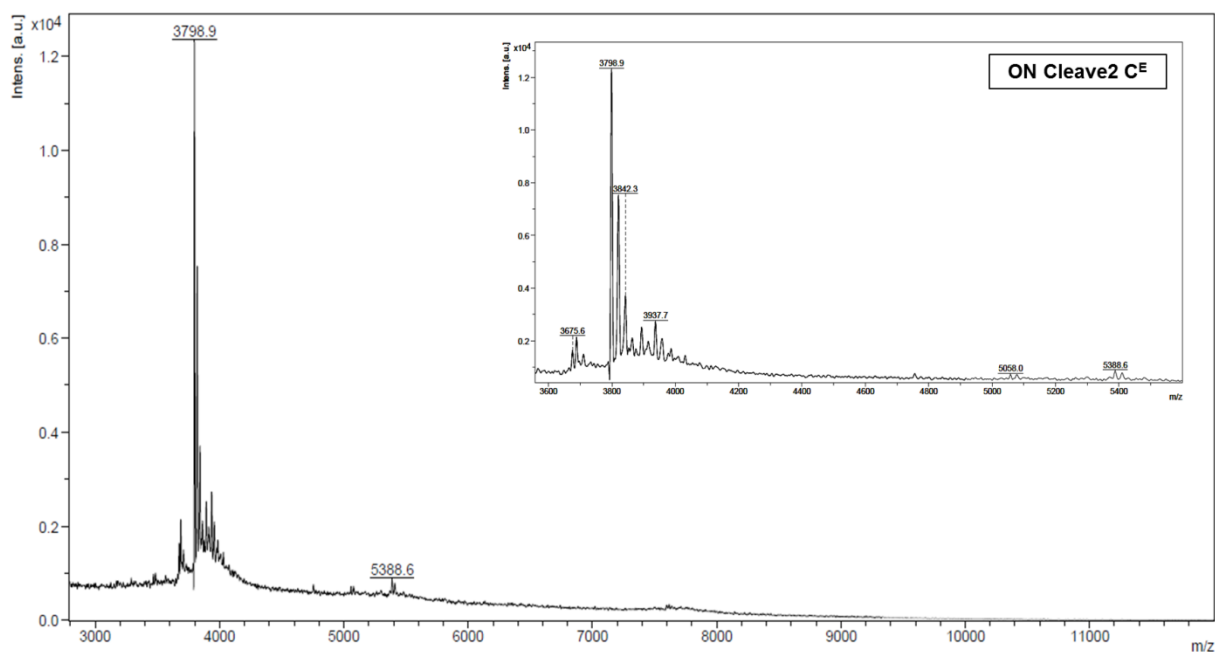

**Figure S38.** MALDI-TOF spectrum of ON Cleave2 C<sup>E</sup>.

M (calc.) = 3 797.5 Da, M (found) = 3 798.8 Da ([M+H]<sup>+</sup>).

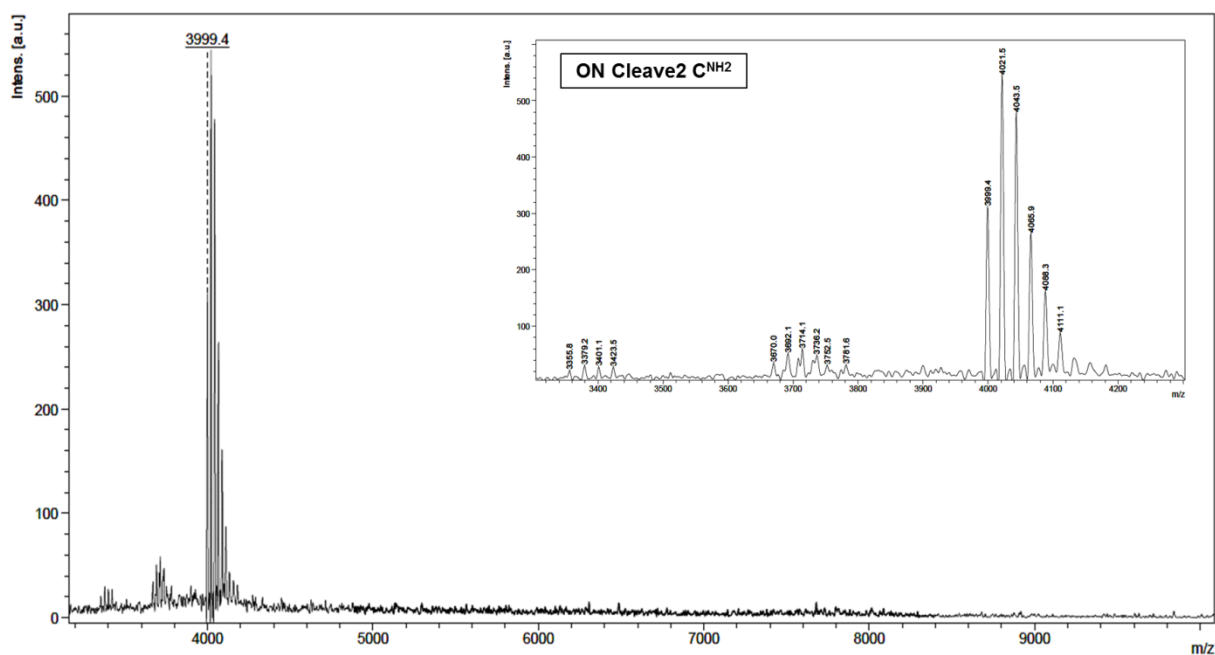

**Figure S39.** MALDI-TOF spectrum of ON Cleave2 C<sup>NH2</sup>.

M (calc.) = 3 998.8 Da, M (found) = 3 999.4 Da ([M+H]<sup>+</sup>).

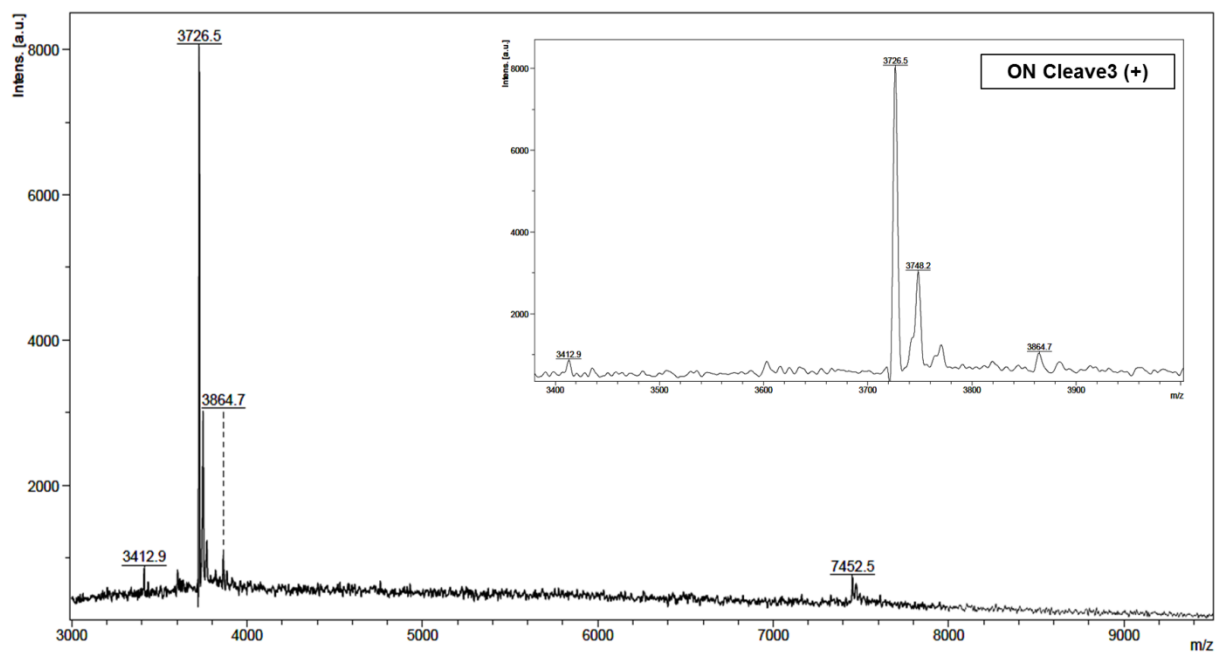

**Figure S40.** MALDI-TOF spectrum of **ON Cleave3 (+)**.

M (calc.) = 3 725.4 Da, M (found) = 3 726.5 Da ( $[M+H]^+$ ).

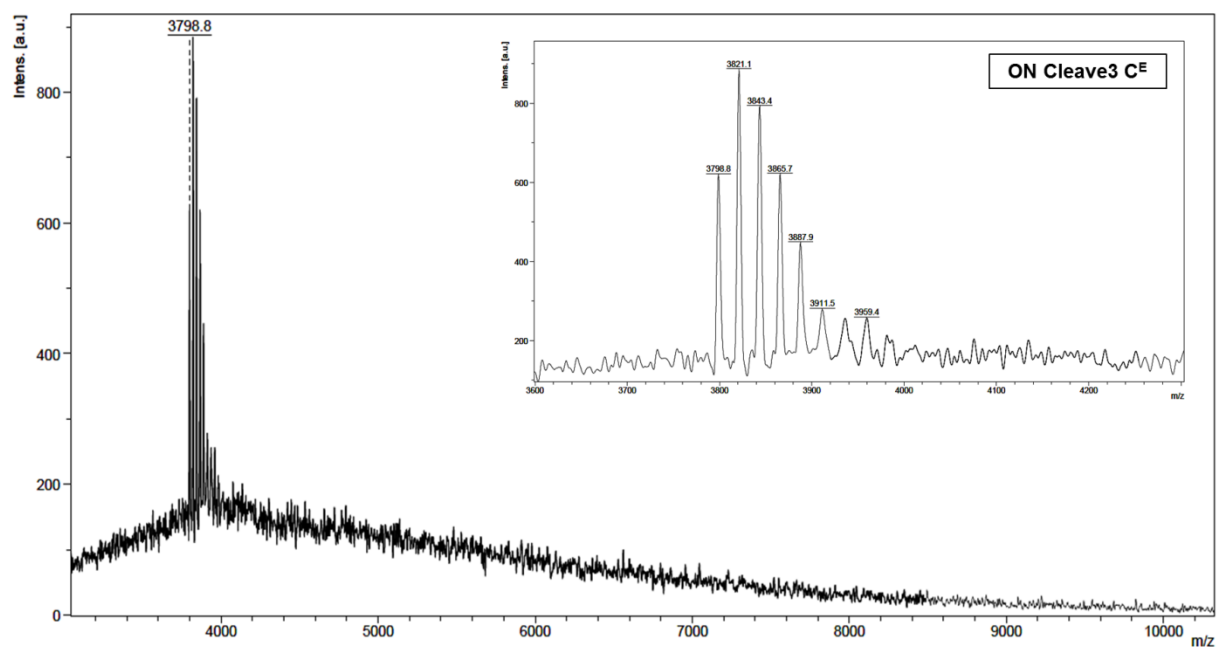

**Figure S41.** MALDI-TOF spectrum of **ON Cleave3 C<sup>E</sup>**.

M (calc.) = 3 797.5 Da, M (found) = 3 798.8 ( $[M+H]^+$ ).

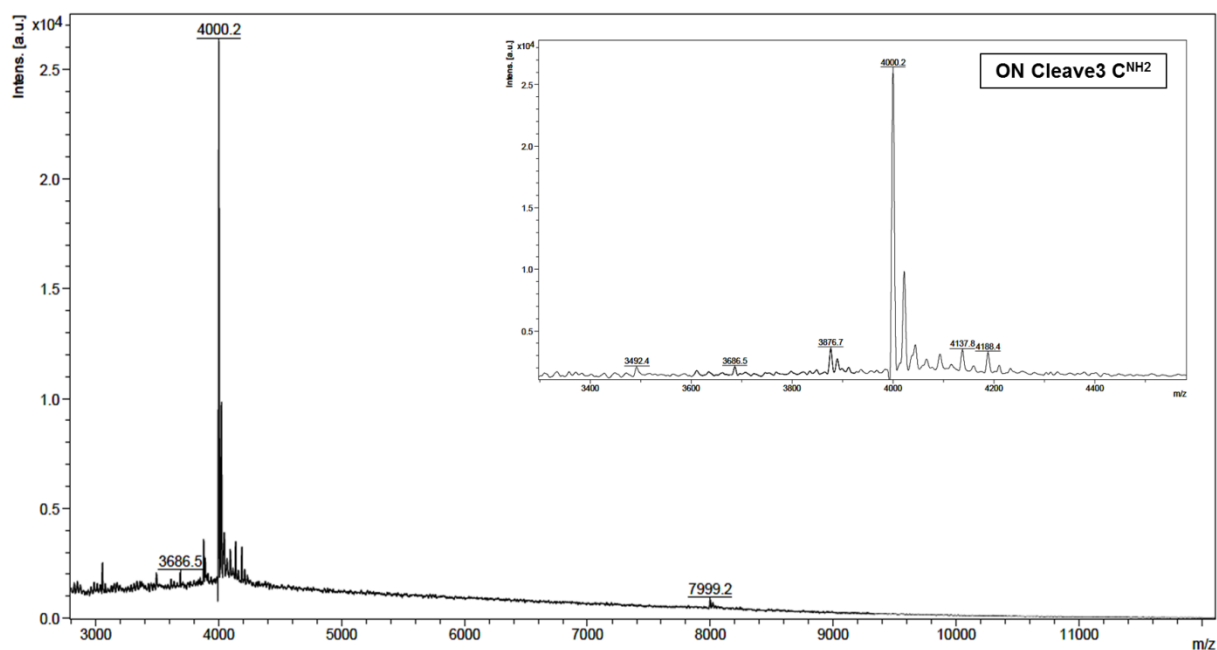

**Figure S42.** MALDI-TOF spectrum of **ON Cleave3 C<sup>NH2</sup>**.

M (calc.) = 3 998.8 Da, M (found) = 4 000.2 Da ( $[M+H]^+$ ).

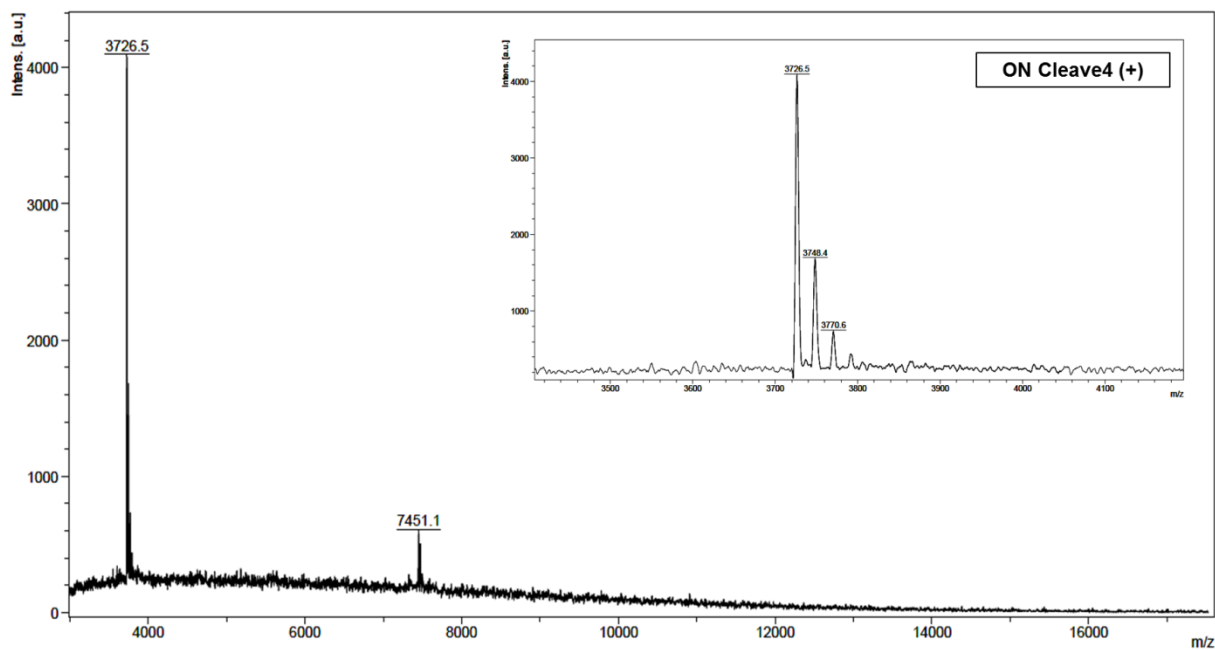

**Figure S43.** MALDI-TOF spectrum of **ON Cleave4 (+)**.

M (calc.) = 3 725.4 Da, M (found) = 3 726.5 Da ( $[M+H]^+$ ).

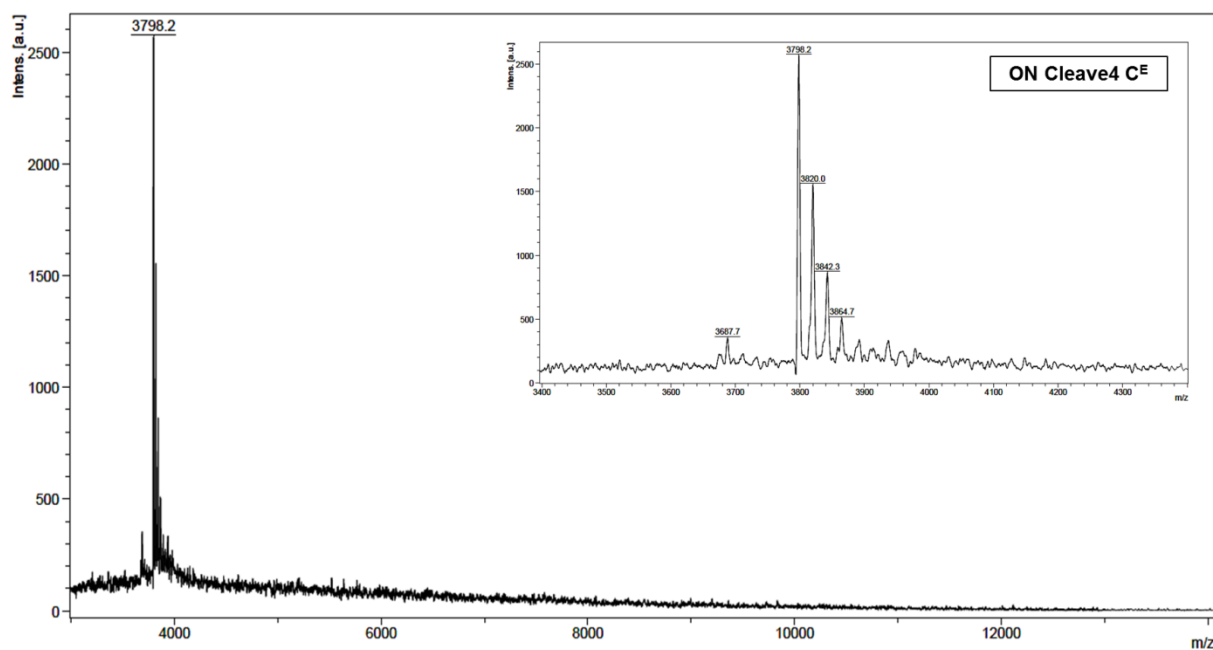

**Figure S44.** MALDI-TOF spectrum of **ON Cleave4 C<sup>E</sup>**.

M (calc.) = 3 797.5 Da, M (found) = 3 798.2 Da ( $[M+H]^+$ ).

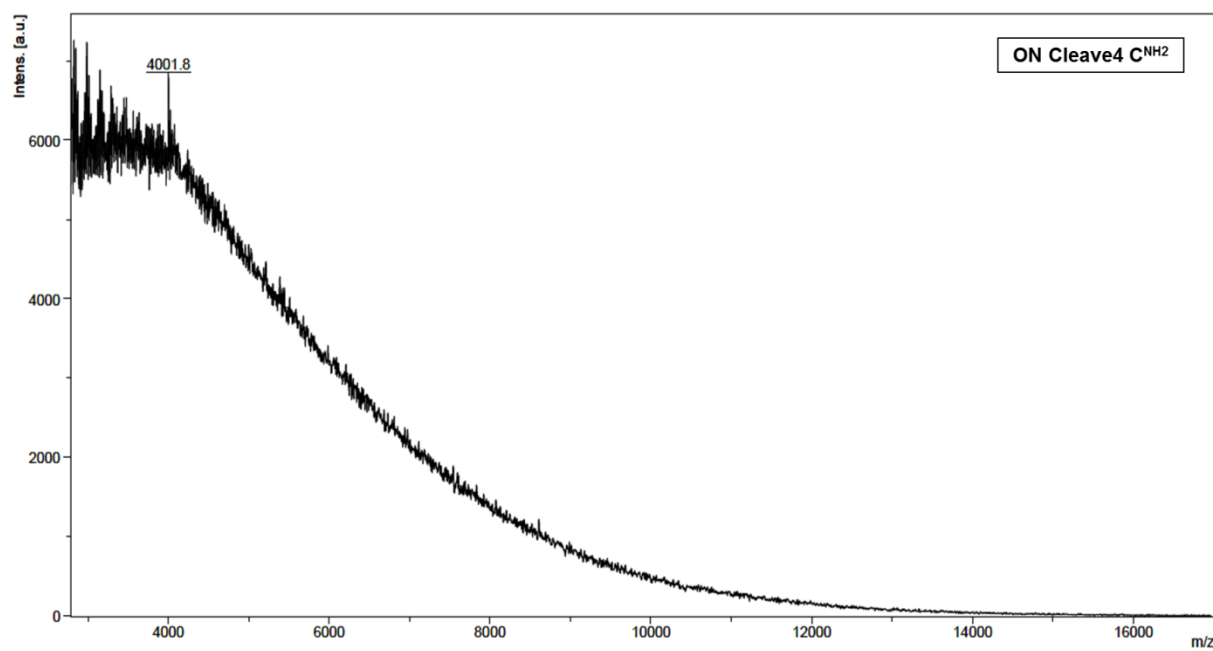

**Figure S45.** MALDI-TOF spectrum of **ON Cleave4 C<sup>NH2</sup>**.

M (calc.) = 3 998.8 Da, M (found) = 4 001.8 Da ( $[M+H]^+$ ).

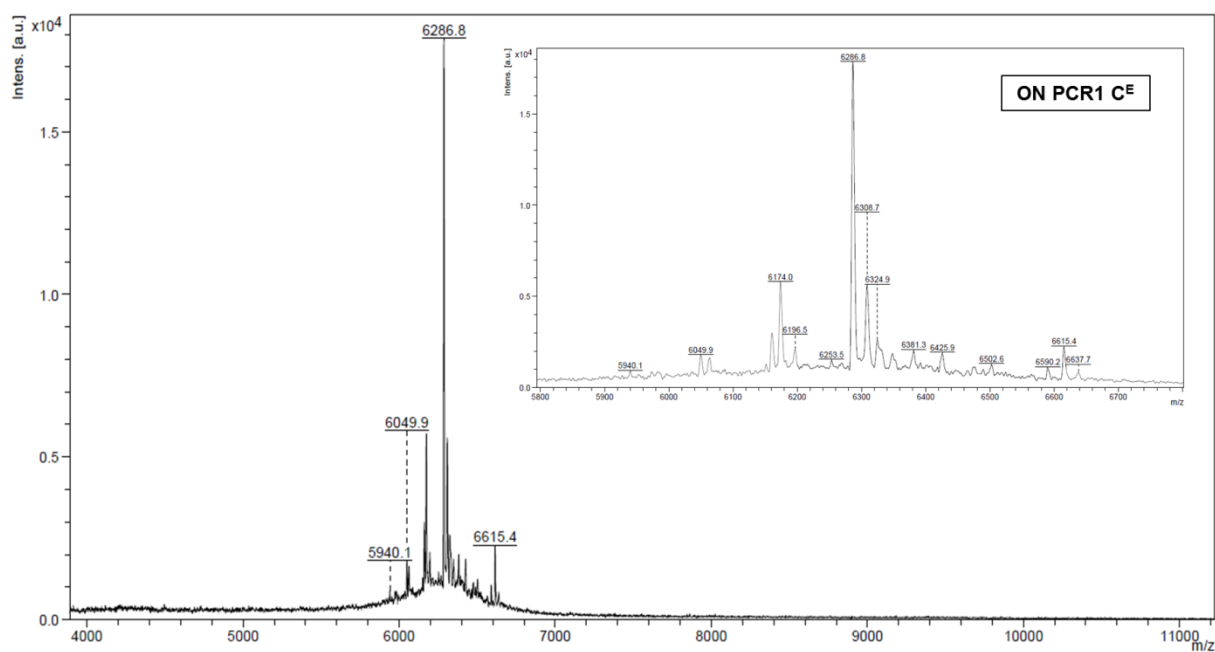

**Figure S46.** MALDI-TOF spectrum of **ON PCR1 C<sup>E</sup>**.

M (calc.) = 6 285.1 Da, M (found) = 6 286.8 Da ( $[M+H]^+$ ).

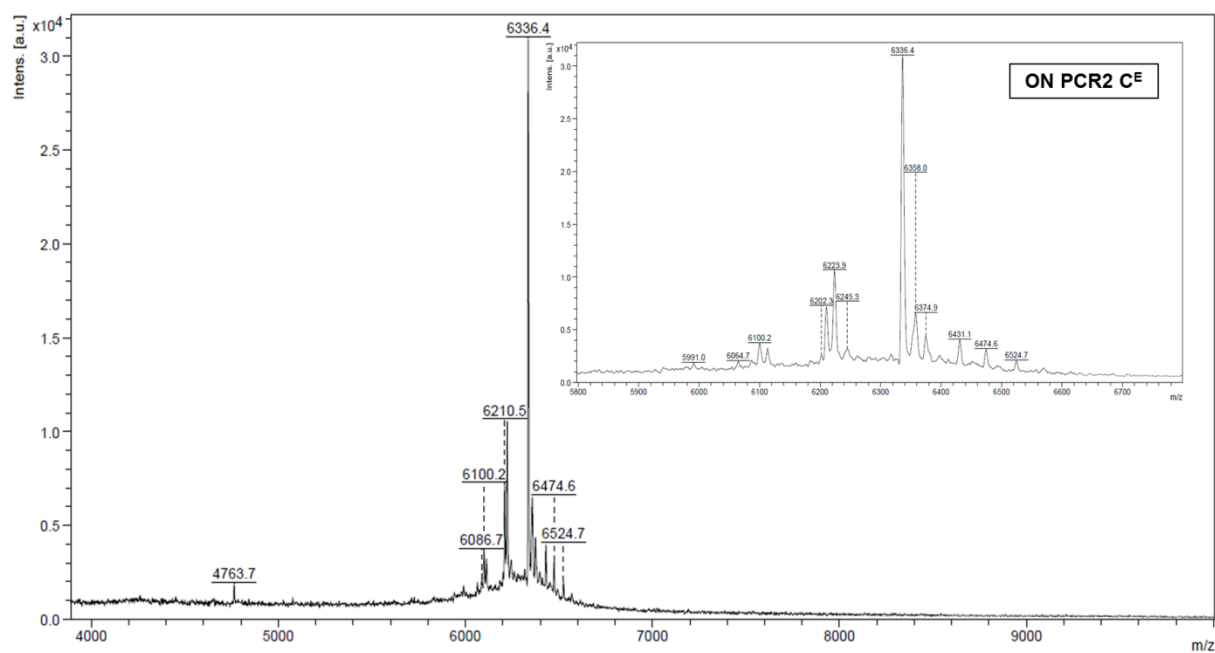

**Figure S47.** MALDI-TOF spectrum of **ON PCR2 C<sup>E</sup>**.

M (calc.) = 6 335.2 Da, M (found) = 6 336.4 Da ( $[M+H]^+$ ).

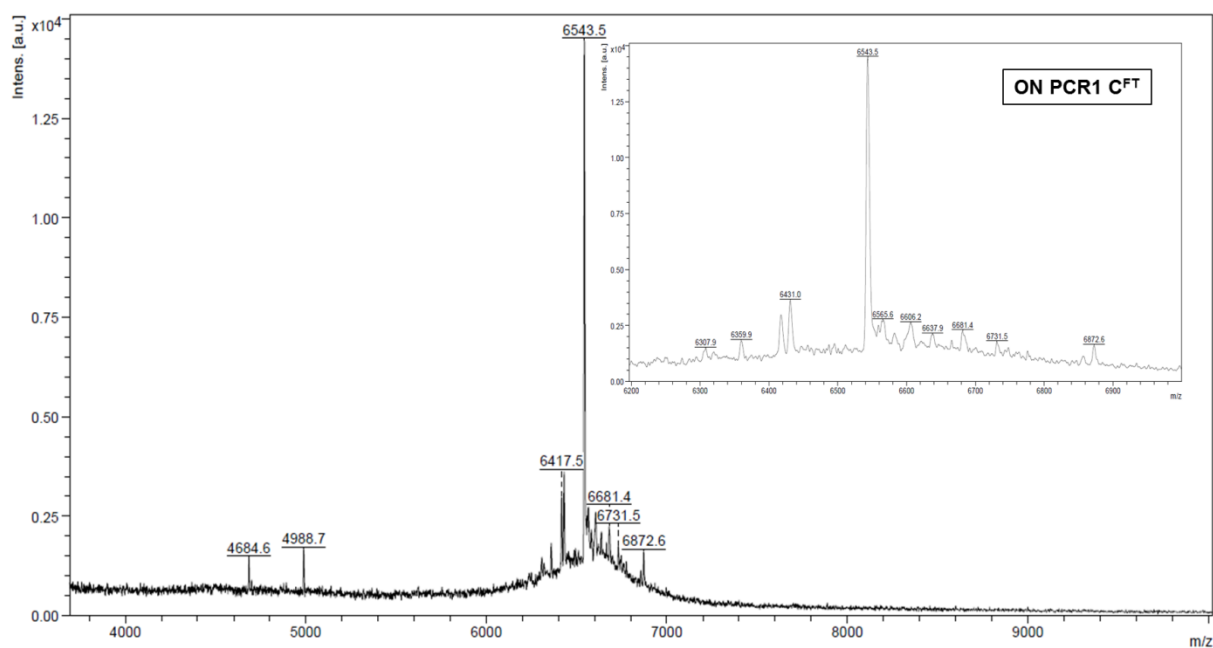

**Figure S48.** MALDI-TOF spectrum of **ON PCR1 C<sup>FT</sup>**.

M (calc.) = 6 542.9 Da, M (found) = 6 543.5 Da ( $[M+H]^+$ ).

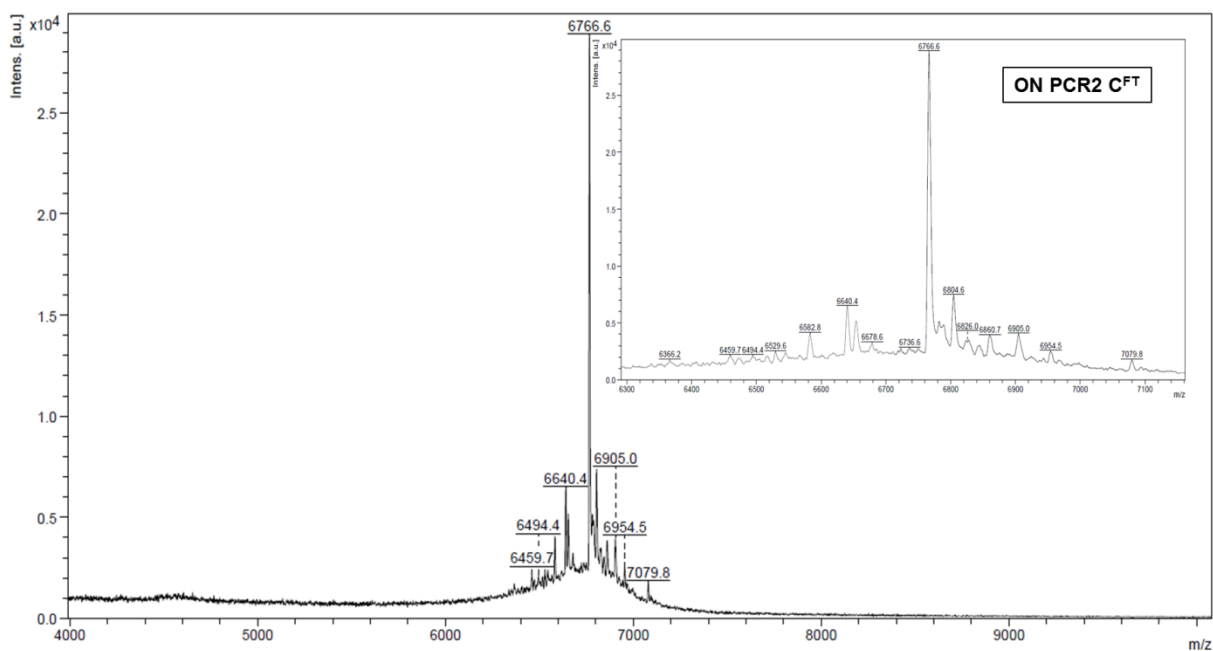

**Figure S49.** MALDI-TOF spectrum of **ON PCR2 C<sup>FT</sup>**.

M (calc.) = 6 765.8 Da, M (found) = 6 766.6 Da ( $[M+H]^+$ ).

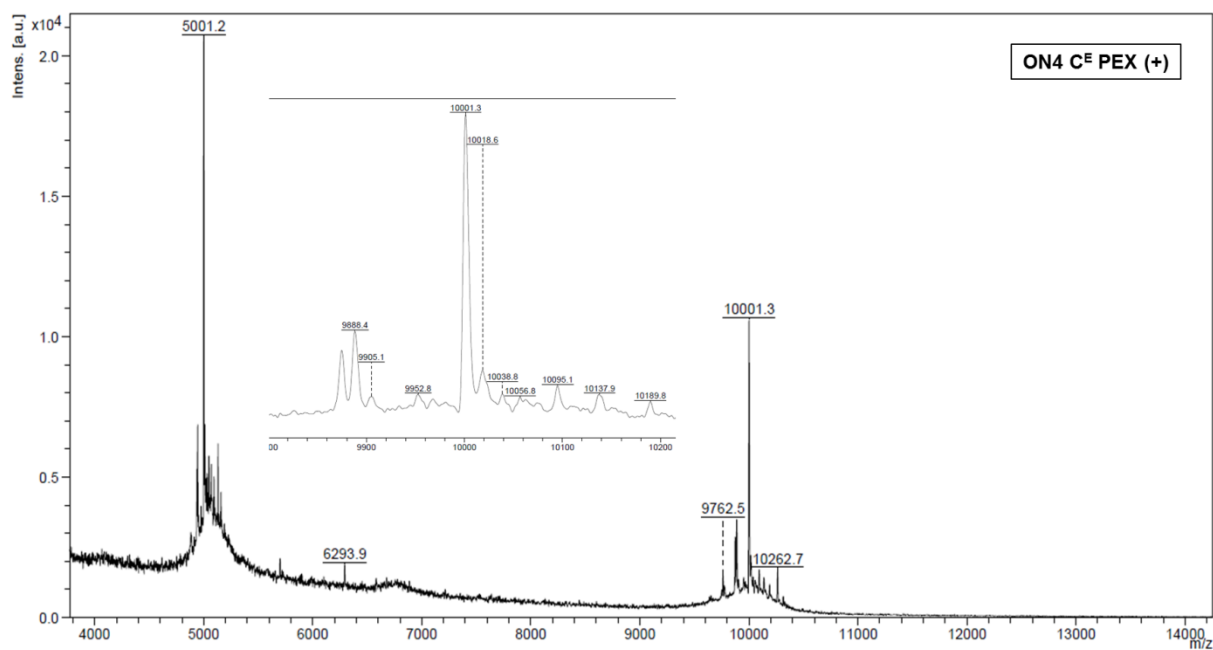

**Figure S50.** MALDI-TOF spectrum of **ON4 C<sup>E</sup> PEX (+)**.

M (calc.) = 10 000.5 Da, M (found) = 10 001.3 Da ( $[M+H]^+$ ).

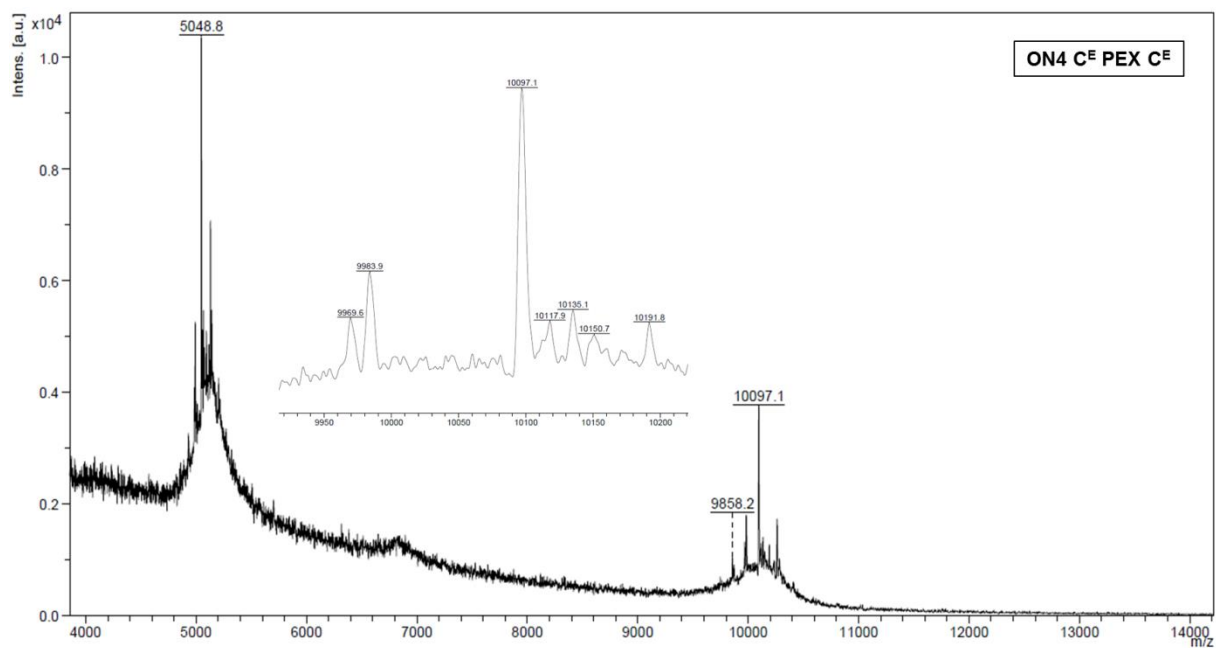

**Figure S51.** MALDI-TOF spectrum of **ON4 C<sup>E</sup> PEX C<sup>E</sup>**.

M (calc.) = 10 096.6 Da, M (found) = 10 097.1 Da ( $[M+H]^+$ ).



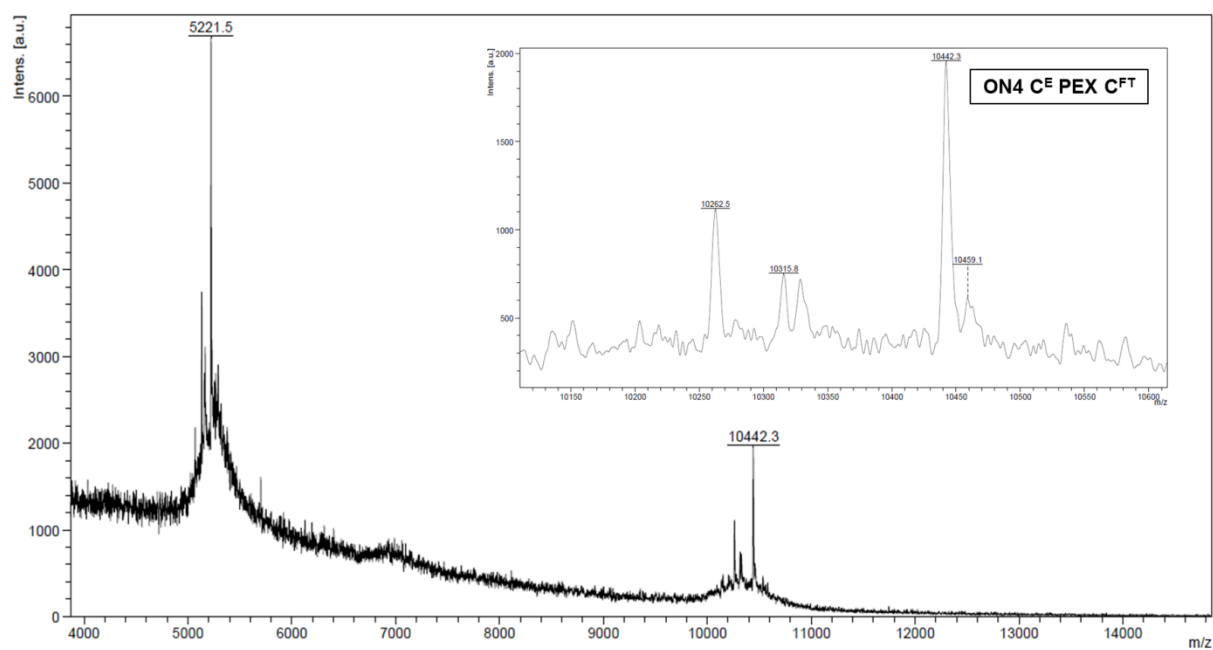

**Figure S52.** MALDI-TOF spectrum of **ON4 C<sup>E</sup> PEX C<sup>FT</sup>**.

M (calc.) = 10 441.1 Da, M (found) = 10 442.3 Da ( $[M+H]^+$ ).

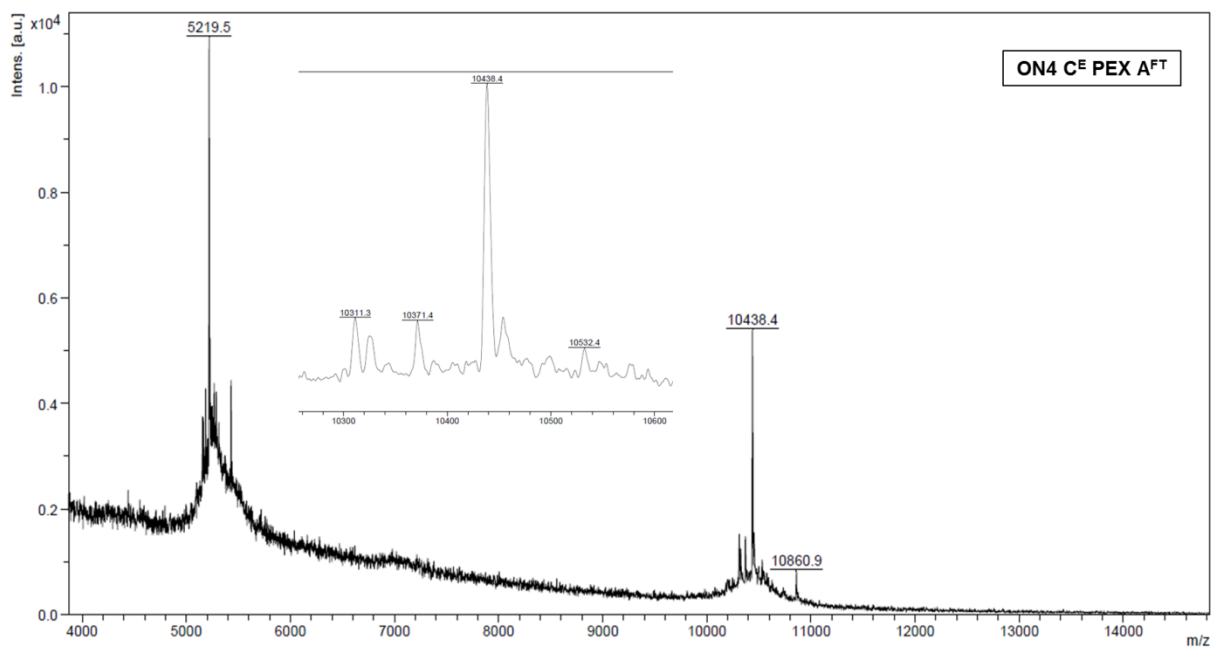

**Figure S53.** MALDI-TOF spectrum of **ON4 C<sup>E</sup> PEX A<sup>FT</sup>**.

M (calc.) = 10 437.1 Da, M (found) = 10 438.4 Da ( $[M+H]^+$ ).

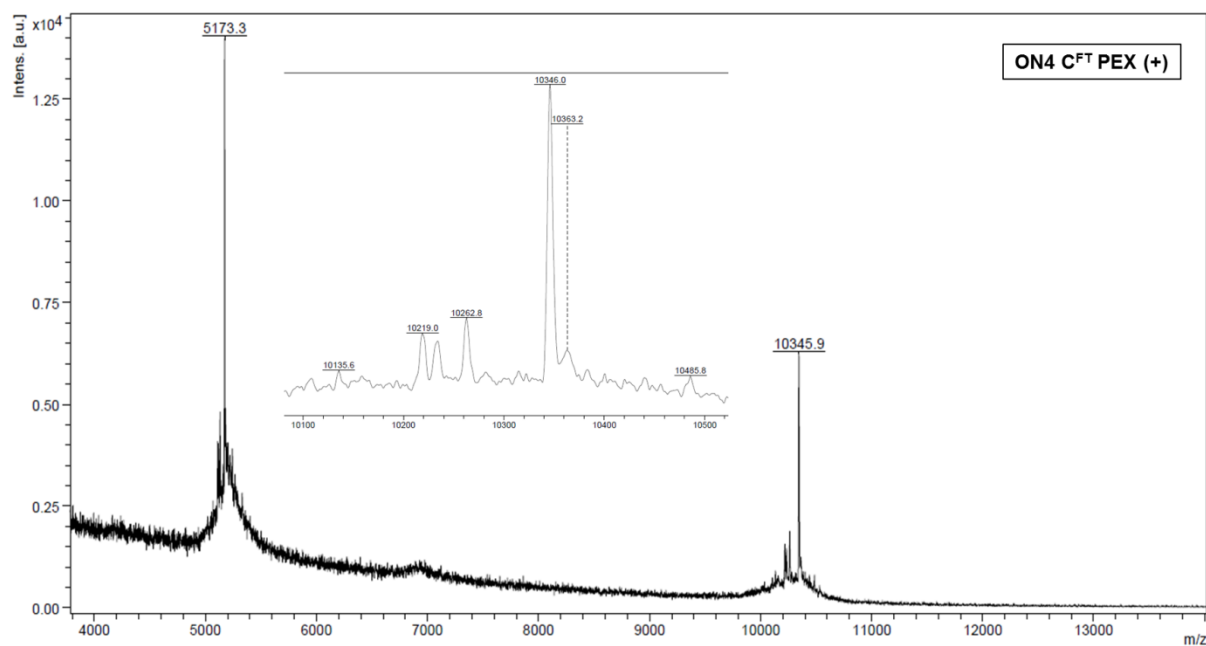

**Figure S54.** MALDI-TOF spectrum of **ON4 C<sup>FT</sup> PEX (+)**.

M (calc.) = 10 345.0 Da, M (found) = 10 345.9 Da ( $[M+H]^+$ ).

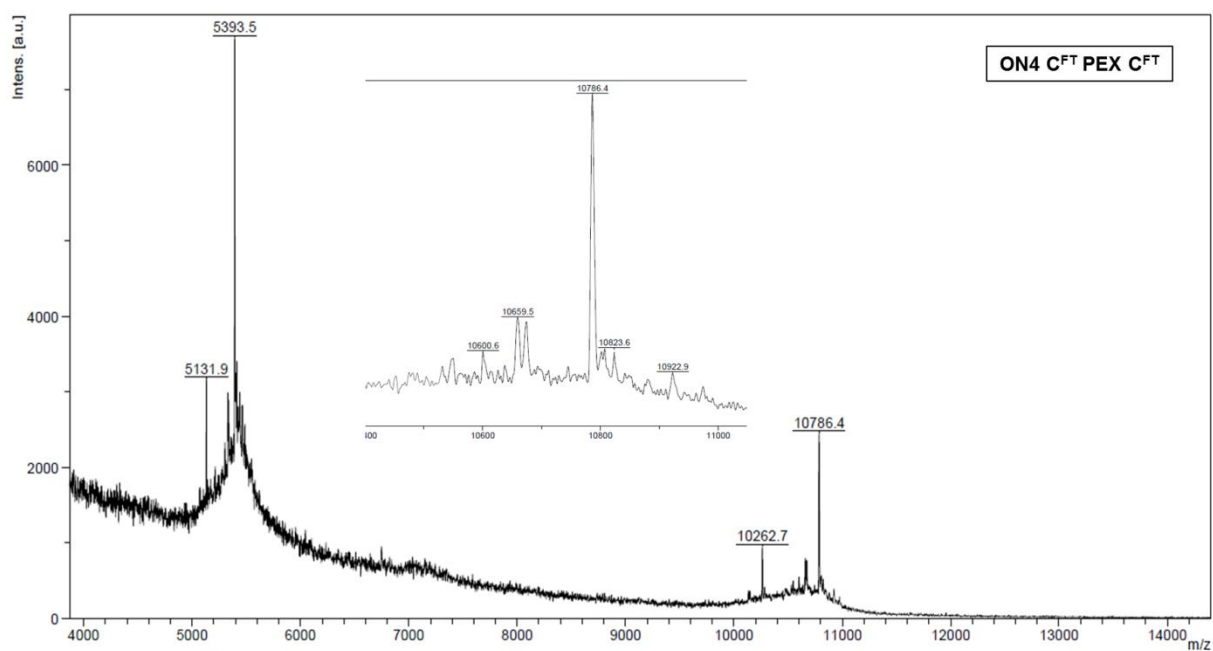

**Figure S55.** MALDI-TOF spectrum of **ON4 C<sup>FT</sup> PEX C<sup>FT</sup>**.

M (calc.) = 10 785.6 Da, M (found) = 10 786.4 Da ( $[M+H]^+$ ).

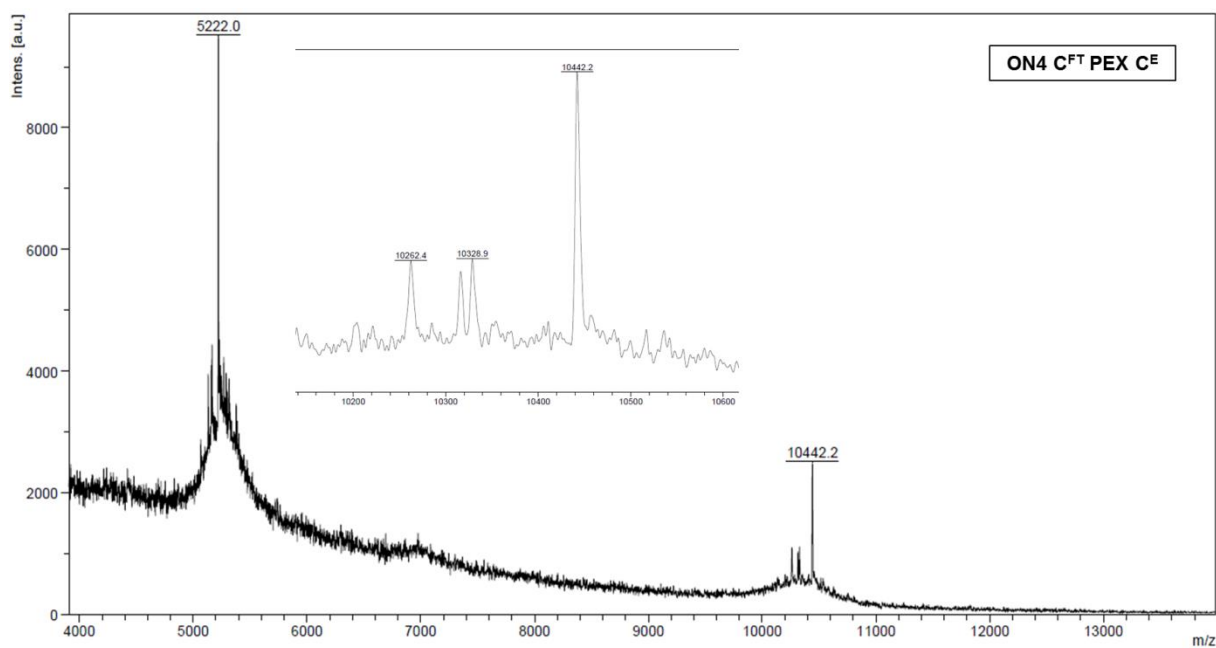

**Figure S56.** MALDI-TOF spectrum of **ON4 C<sup>FT</sup> PEX C<sup>E</sup>**.

M (calc.) = 10 441.1 Da, M (found) = 10 442.2 Da ( $[M+H]^+$ ).

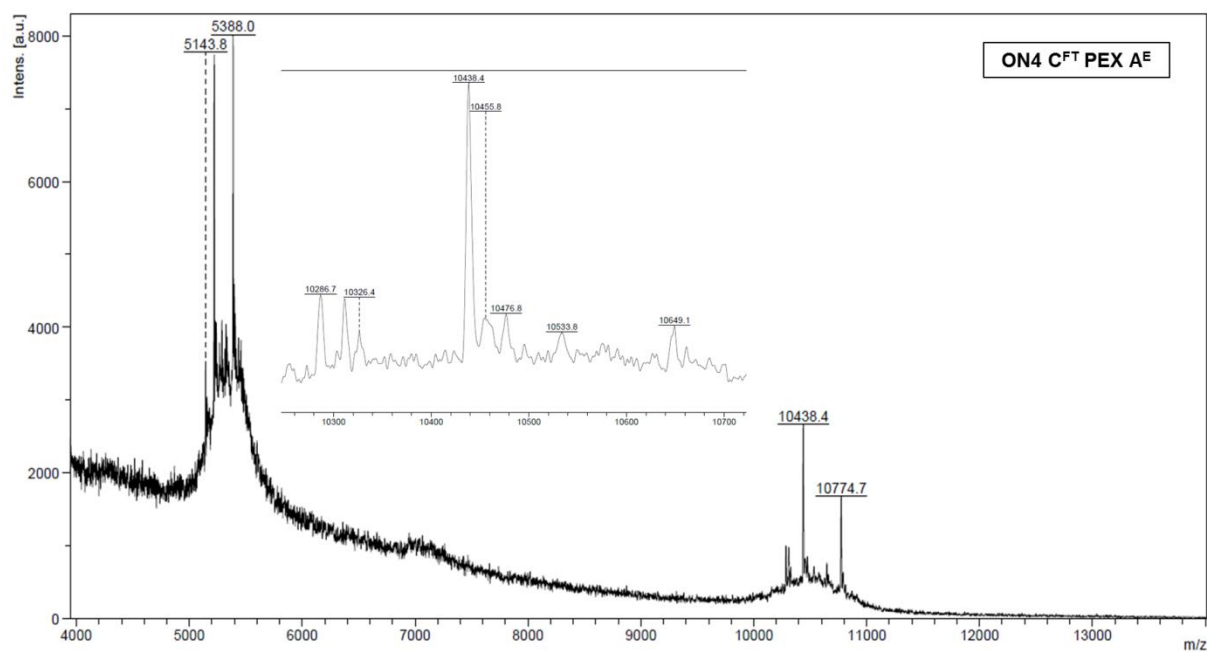

**Figure S57.** MALDI-TOF spectrum of **ON4 C<sup>FT</sup> PEX A<sup>E</sup>**.

M (calc.) = 10 437.1 Da, M (found) = 10 438.4 Da ( $[M+H]^+$ ).

## References

- [S1] Ménová,P. and Hocek,M. (2012) Preparation of short cytosine-modified oligonucleotides by nicking enzyme amplification reaction. *Chem. Commun.*, **48**, 6921–6923.
